# Supplementary material for: Upgrading of nitrate to hydrazine through cascading electrocatalytic ammonia production with controllable N-N coupling
Source: PubMed Central journal article supplement — Nat Commun. 2024 Oct 3;15:8567. doi: 10.1038/s41467-024-52825-1 (PMC11450151; doi:10.1038/s41467-024-52825-1), 2024-10-03
Supplement: 41467_2024_52825_MOESM1_ESM.pdf [file 41467_2024_52825_MOESM1_ESM.pdf]

Supplementary Information for

**Upgrading of nitrate to hydrazine through cascading electrocatalytic ammonia production with controllable N-N coupling**

Shunhan Jia<sup>1,2</sup>, Libing Zhang<sup>1,2</sup>, Hanle Liu<sup>1,2,3</sup>, Ruhan Wang<sup>1,2</sup>, Xiangyuan Jin<sup>1,2</sup>, Limin Wu<sup>1,2</sup>, Xinning Song<sup>1,2</sup>, Xingxing Tan<sup>1</sup>, Xiaodong Ma<sup>1</sup>, Jiaqi Feng<sup>1,4</sup>, Qinggong Zhu<sup>1,2</sup>, Xincheng Kang<sup>1,2</sup>, Qingli Qian<sup>1,2</sup>, Xiaofu Sun<sup>1,2,\*</sup>, Buxing Han<sup>1,2,5,\*</sup>

<sup>1</sup> Beijing National Laboratory for Molecular Sciences, CAS Laboratory of Colloid and Interface and Thermodynamics, CAS Research/Education Center for Excellence in Molecular Sciences, Center for Carbon Neutral Chemistry, Institute of Chemistry, Chinese Academy of Sciences, Beijing 100190, China

<sup>2</sup> School of Chemical Sciences, University of Chinese Academy of Sciences, Beijing 100049, China

<sup>3</sup> College of Chemistry, Nankai University, Tianjin 300071, China

<sup>4</sup> College of Chemical Engineering and Environment, China University of Petroleum, Beijing 102249, China

<sup>5</sup> Shanghai Key Laboratory of Green Chemistry and Chemical Processes, State Key Laboratory of Petroleum Molecular & Process Engineering, School of Chemistry and Molecular Engineering, East China Normal University, Shanghai 200062, China

\*Email: sunxiaofu@iccas.ac.cn (X.F.S.); hanbx@iccas.ac.cn (B.X.H.)

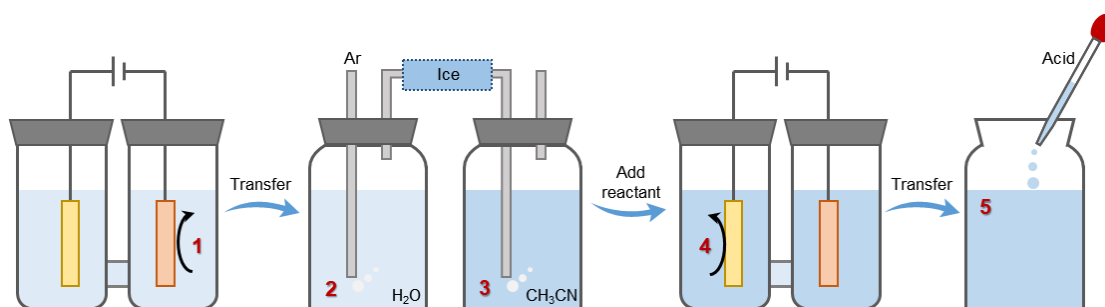

**Figure S1.** Illustration of reaction pathway of electrocatalytic upgrading of  $\text{NO}_x$  to  $\text{N}_2\text{H}_4$  through the following steps: 1. Electroreduction of  $\text{NO}_x$  to  $\text{NH}_3$ ; 2. Remove  $\text{NH}_3$  with Ar; 3. Collected  $\text{NH}_3$  in electrolyte; 4. Ketone-mediated N-N coupling; 5. Hydrolysis to obtain  $\text{N}_2\text{H}_4$ .

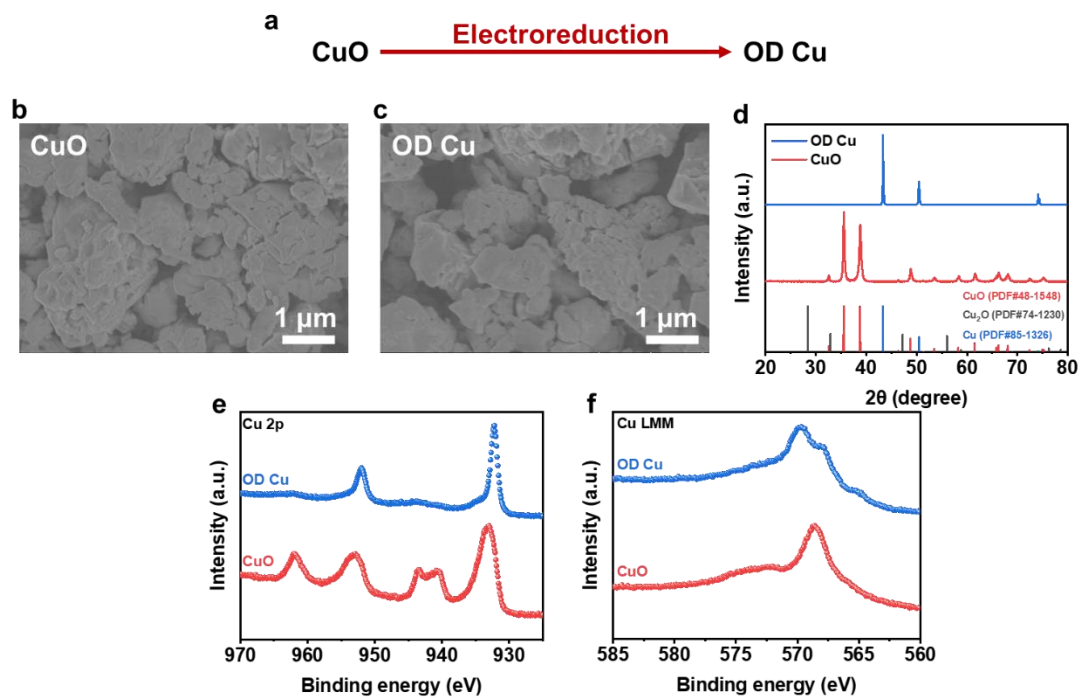

**Figure S2.** (a) Illustration of the generation of OD Cu catalyst. SEM image of (b) CuO and (c) OD Cu catalyst. (d) XRD patterns of CuO and OD Cu catalyst. (e) XPS spectra in the regions of Cu 2p and (f) Cu Auger LMM spectra of CuO and OD Cu catalyst.

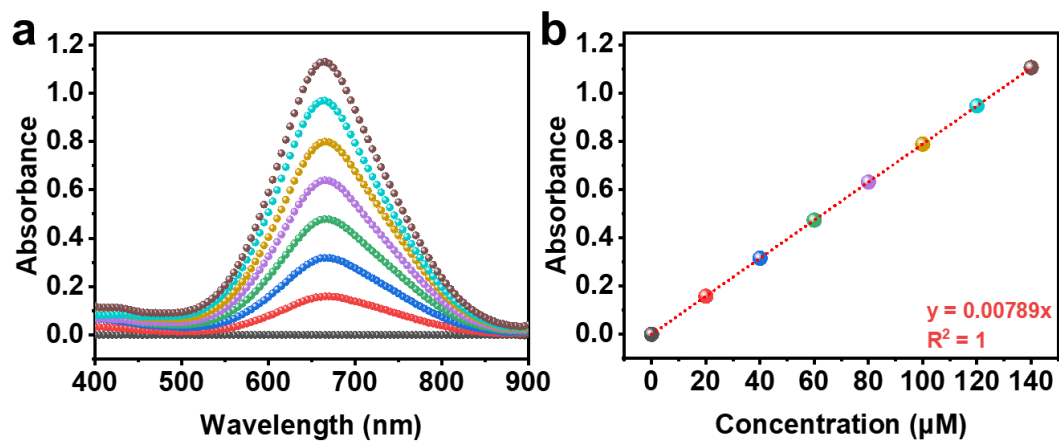

**Figure S3.** (a) UV-vis spectra of various concentration of  $\text{NH}_3$ . (b) The corresponding standard calibration curve for the assessment of  $\text{NH}_3$ .

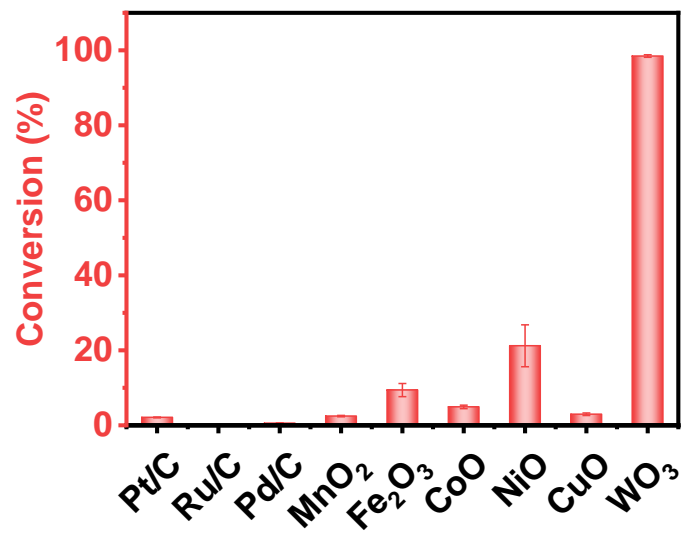

**Figure S4.** Catalyst screening for N<sub>2</sub>H<sub>4</sub> synthesis by using different catalysts.

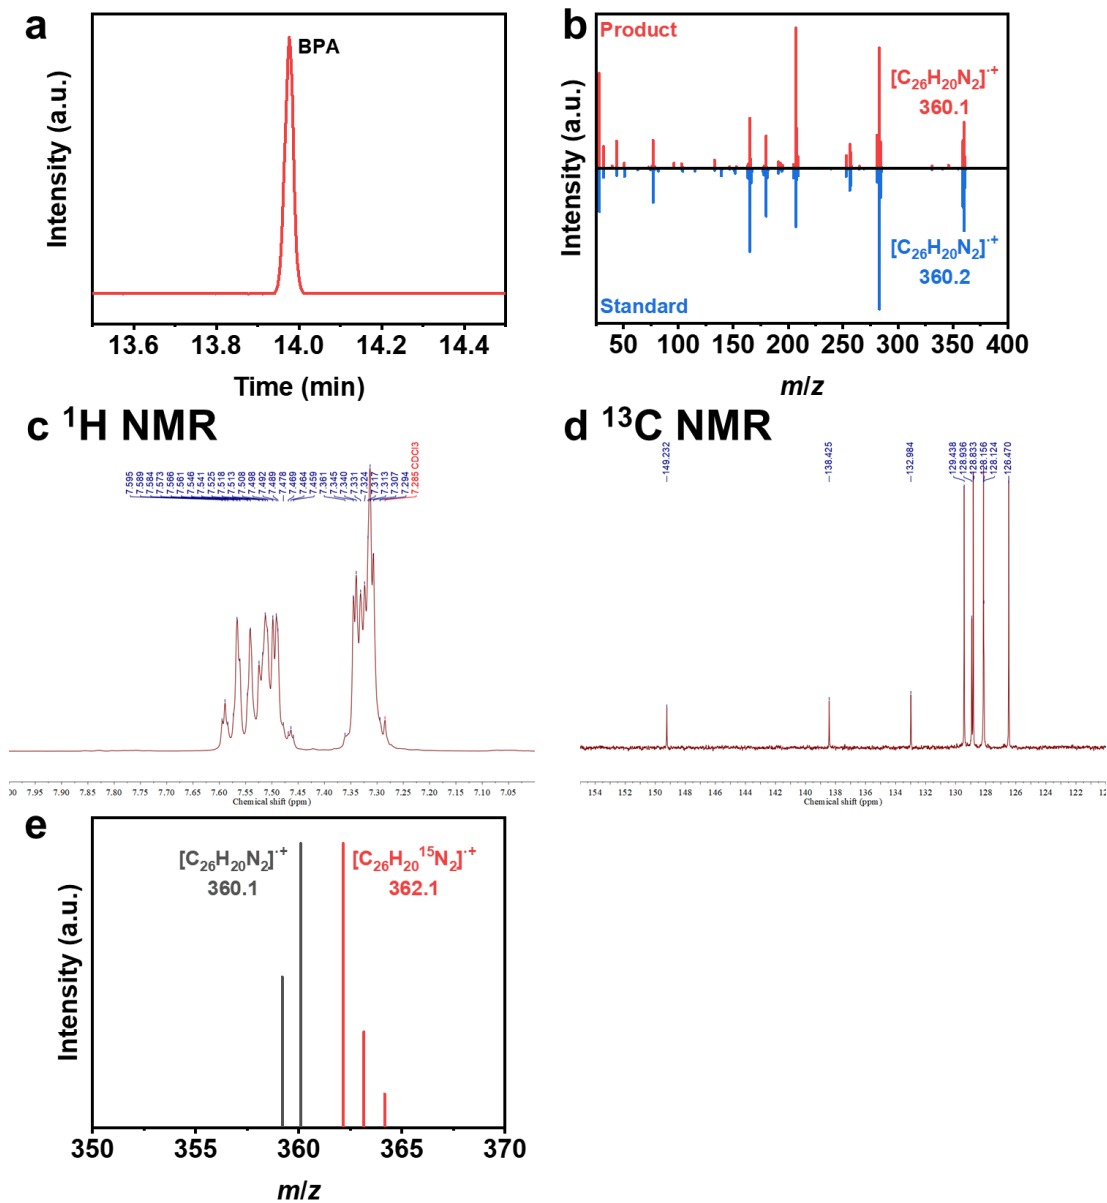

**Figure S5.** (a) GC and (b) MS spectrum of BPA. (c)  $^1H$  NMR and (d)  $^{13}C$  NMR spectrum of BPA. (e) MS of BPA generated from  $^{15}N$   $KNO_3$ .

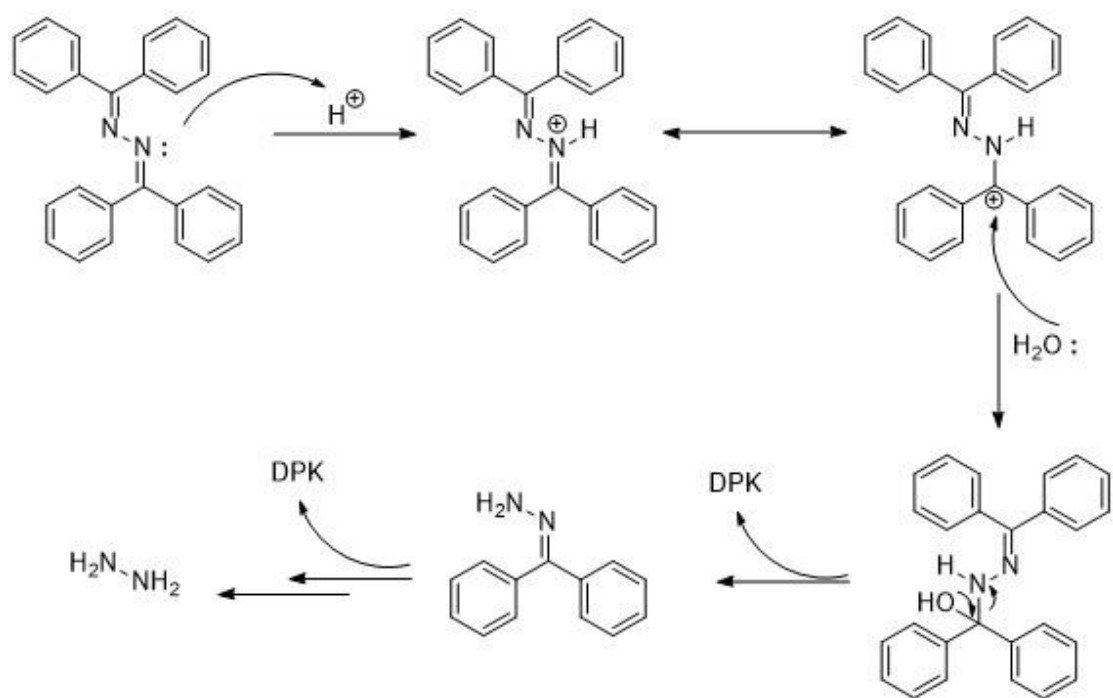

**Figure S6.** The mechanism of BPA hydrolysis in acid aqueous solution.

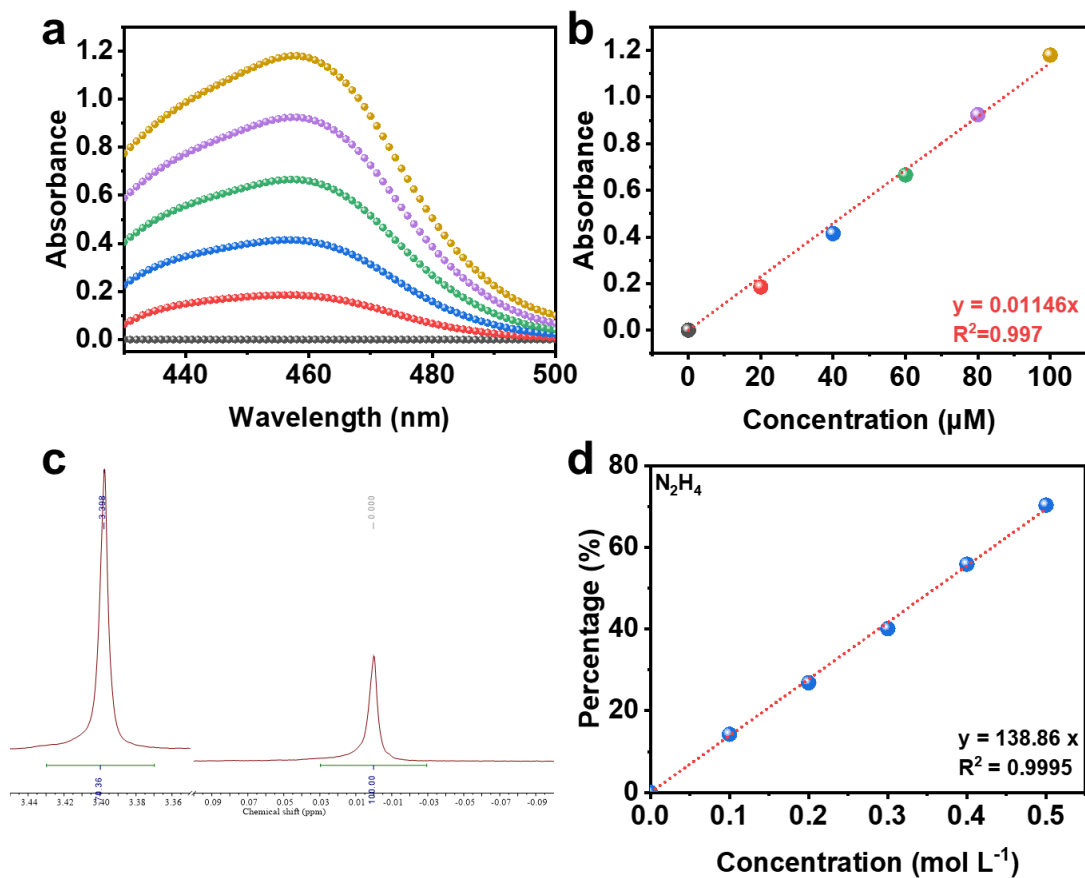

**Figure S7.** (a) UV-vis spectra of various concentration of  $N_2H_4$ . (b) The corresponding standard calibration curve for the assessment of  $N_2H_4$  using UV-vis spectra. (c)  $^1H$  NMR spectrum of  $0.5 mol L^{-1}$  of  $N_2H_4$  standard and DSS interior label. (d) The corresponding standard calibration curve for the assessment of  $N_2H_4$  using  $^1H$  NMR.



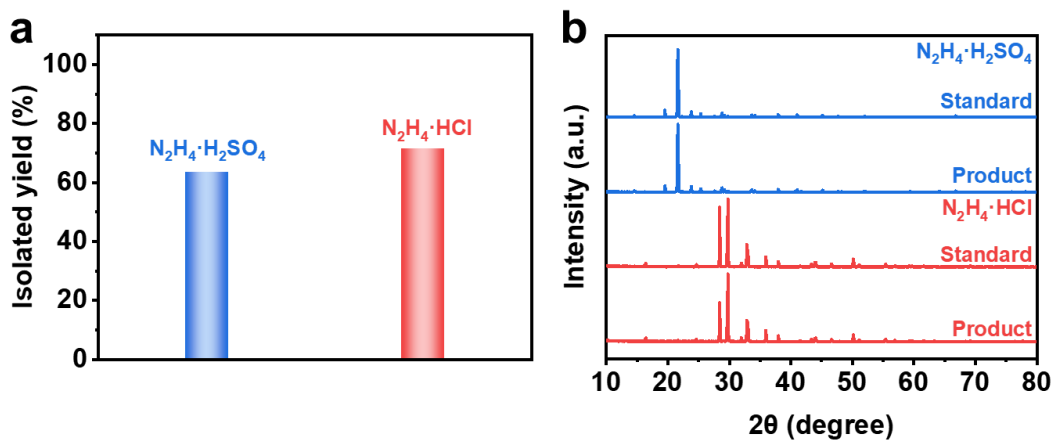

**Figure S8.** (a) Isolated yield and (b) corresponding XRD patterns of isolated  $N_2H_4$  salts products compared with standard sample.

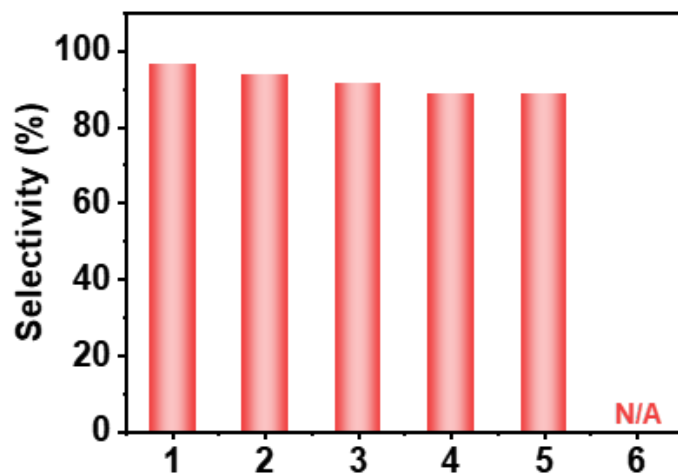

**Figure S9.** Selectivity of the nitrogenous species during the electrocatalytic upgrading of  $\text{NO}_x$  to  $\text{N}_2\text{H}_4$  through several steps as following: 1. Electroreduction of  $\text{NO}_x$  to  $\text{NH}_3$ ; 2. Remove  $\text{NH}_3$  with Ar; 3. Collected  $\text{NH}_3$  in electrolyte; 4. Ketone-mediated N-N coupling; 5. Hydrolysis to obtain  $\text{N}_2\text{H}_4$ ; 6. Direct  $\text{NH}_3$  oxidation to  $\text{N}_2\text{H}_4$ .

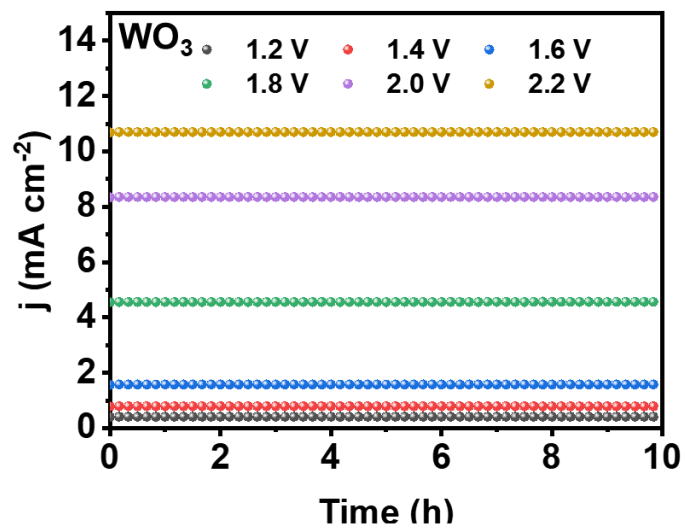

**Figure S10.** Chronoamperometry curves of BPA formation from 1.2 V to 2.2 V over WO<sub>3</sub> electrocatalyst.

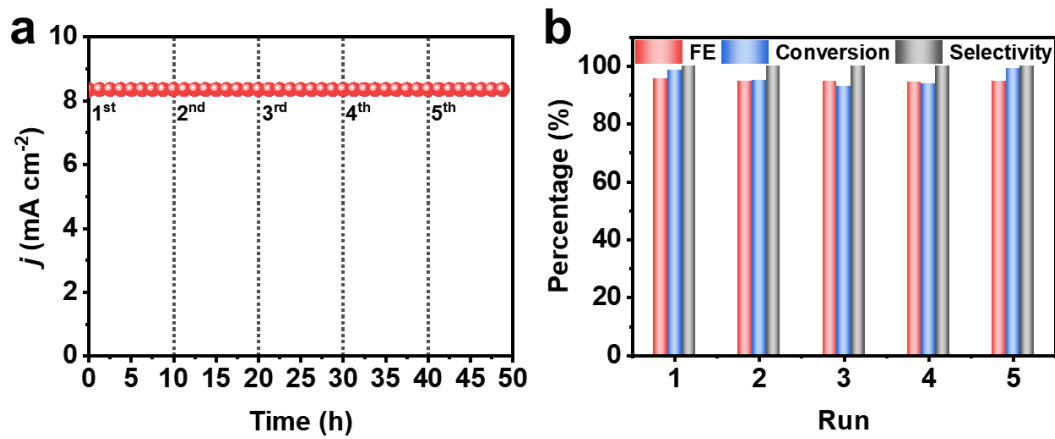

**Figure S11.** (a) Chronoamperometry curves and (b) BPA FE (red), NH<sub>3</sub> conversion (blue), and BPA selectivity (gray) of WO<sub>3</sub> during consecutive recycling tests at 2.0 V.

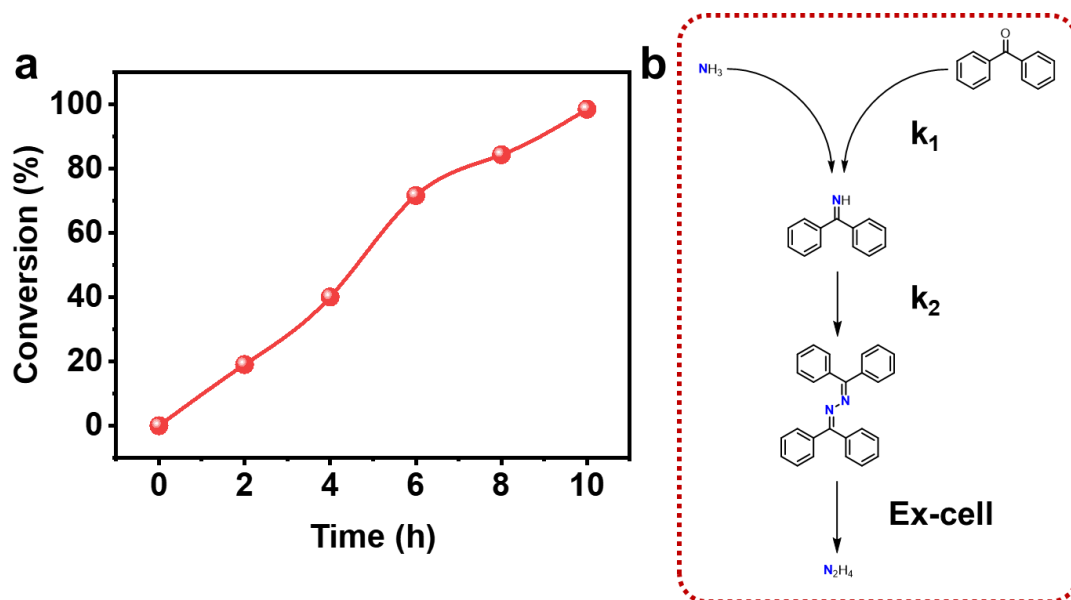

**Figure S12.** (a) Kinetic curve of time-dependence BPA formation on  $\text{WO}_3$  under optimal conditions. (b) Reaction pathway of  $\text{NH}_3$  to BPA.

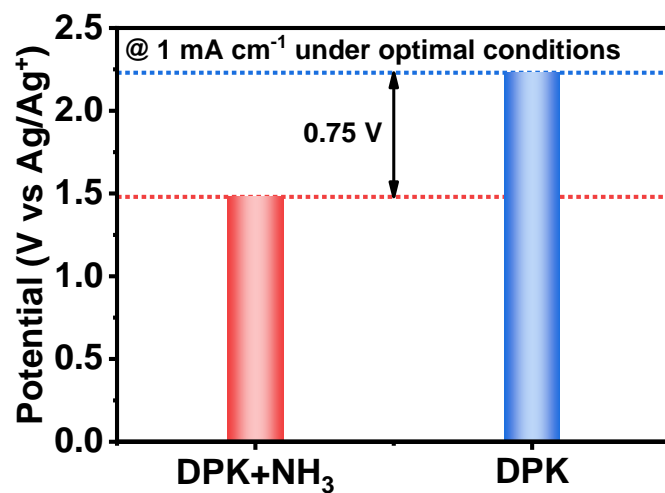

**Figure S13.** The potentials derived from LSV on WO<sub>3</sub> catalyst with DPK with and without NH<sub>3</sub> at a current density of 1 mA cm<sup>-2</sup>.

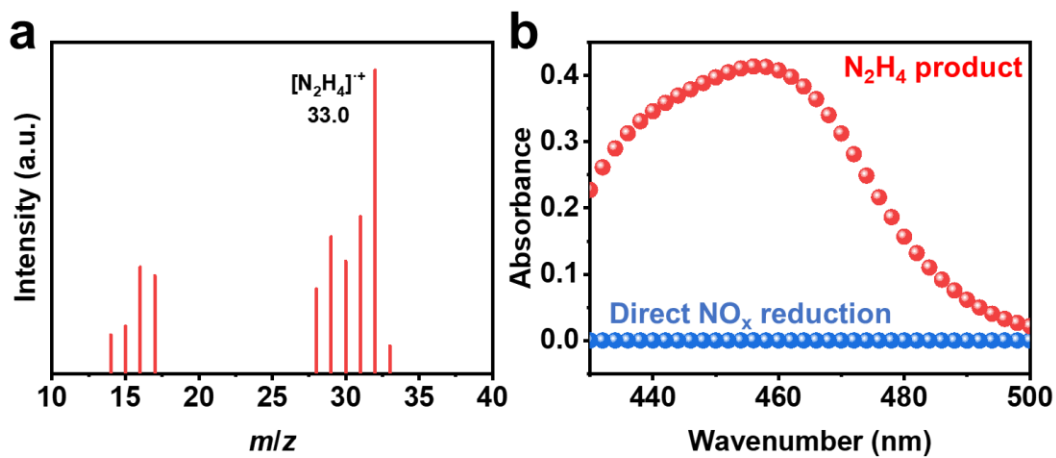

**Figure S14.** (a) MS of N<sub>2</sub>H<sub>4</sub> product generated from BPA. (b). Comparison of the N<sub>2</sub>H<sub>4</sub> products of N<sub>2</sub>H<sub>4</sub> synthesis reported in this study and direct NO<sub>x</sub> reduction through UV-vis spectrometry.

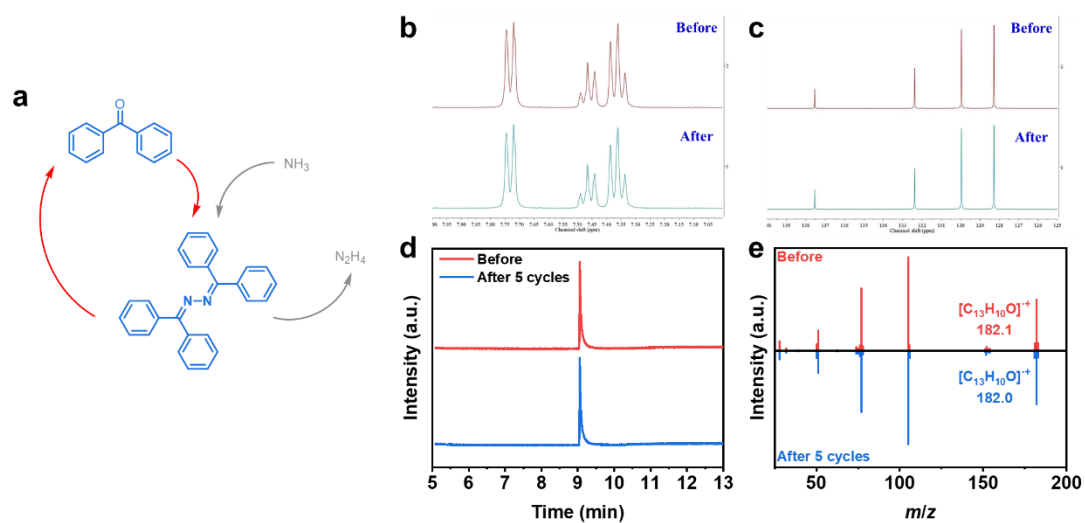

**Figure S15.** (a) illustration of the reusability of DPK. (b)  $^1\text{H}$  NMR spectra, (c)  $^{13}\text{C}$  NMR spectra, (d) GC curves, and (e) MS spectra of initial BPA mediator and regenerated BPA after five cycles.



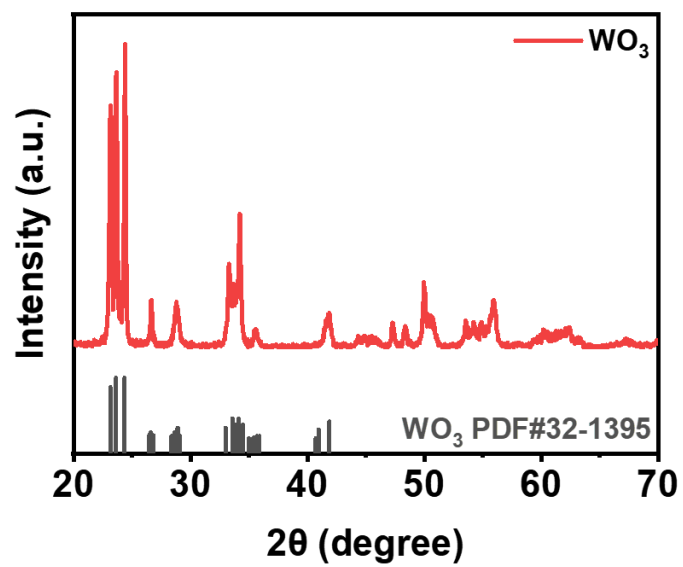

**Figure S16.** XRD patterns of WO<sub>3</sub> electrocatalyst.

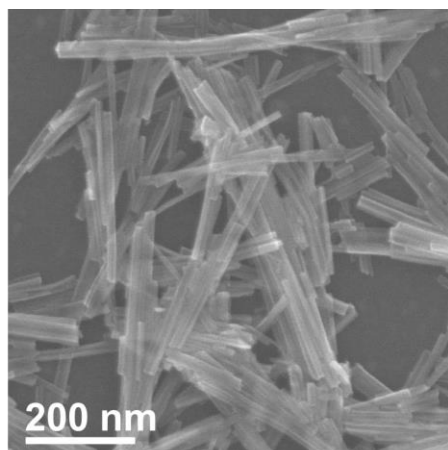

**Figure S17.** SEM image of WO<sub>3</sub> electrocatalyst.

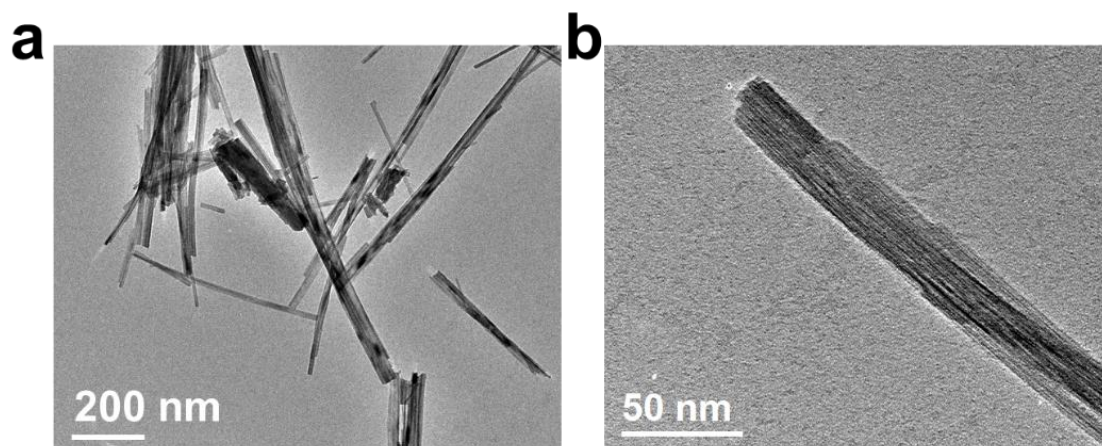

**Figure S18.** TEM image of WO<sub>3</sub> electrocatalyst at (a) low resolution and (b) high resolution.

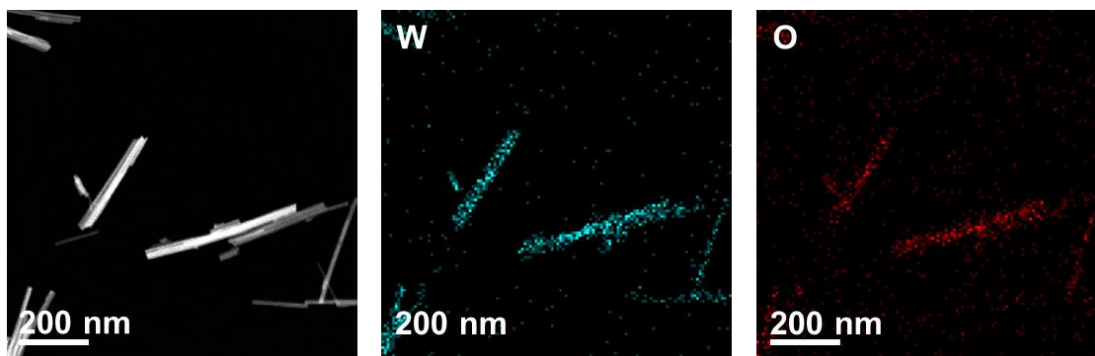

**Figure S19.** EDX mapping images of  $\text{WO}_3$  electrocatalyst.

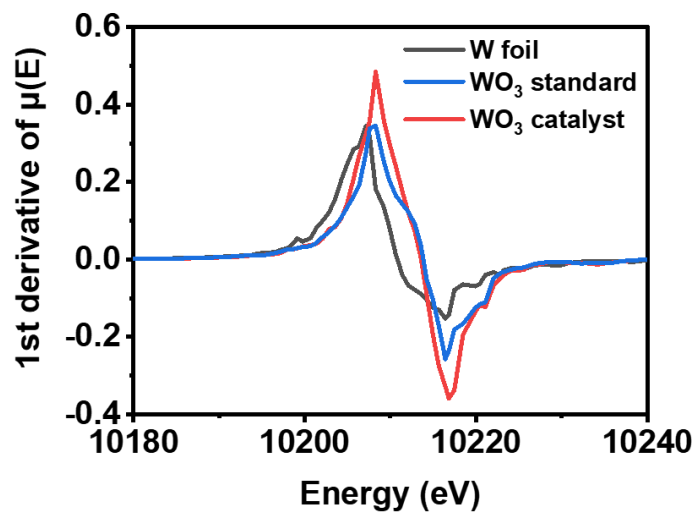

**Figure S20.** The first derivative of XANES spectra of W  $L_3$ -edge in WO<sub>3</sub> catalyst, WO<sub>3</sub> standard, and W foil.

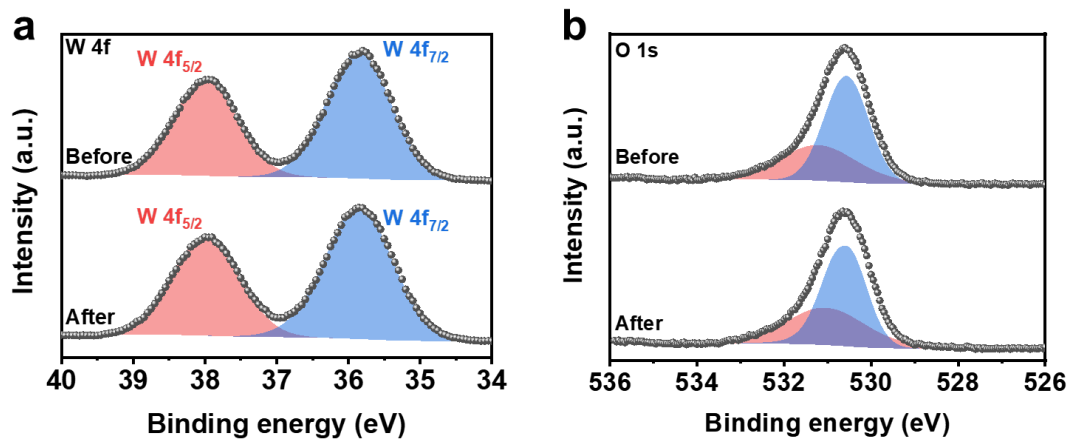

**Figure S21.** XPS spectra of  $\text{WO}_3$  electrocatalyst in the regions of (a) W 4f and (b) O 1s.

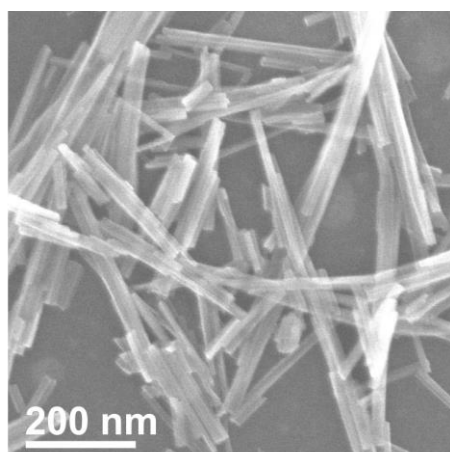

**Figure S22.** SEM image of  $\text{WO}_3$  electrocatalyst after reusability test.

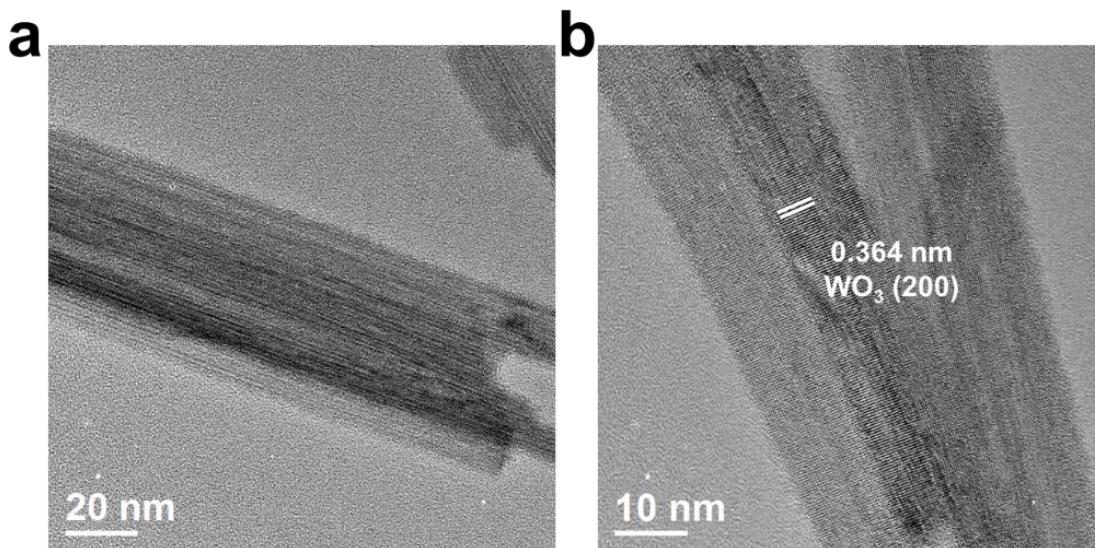

**Figure S23.** TEM image of  $\text{WO}_3$  electrocatalyst after reusability test at (a) low resolution and (b) high resolution.



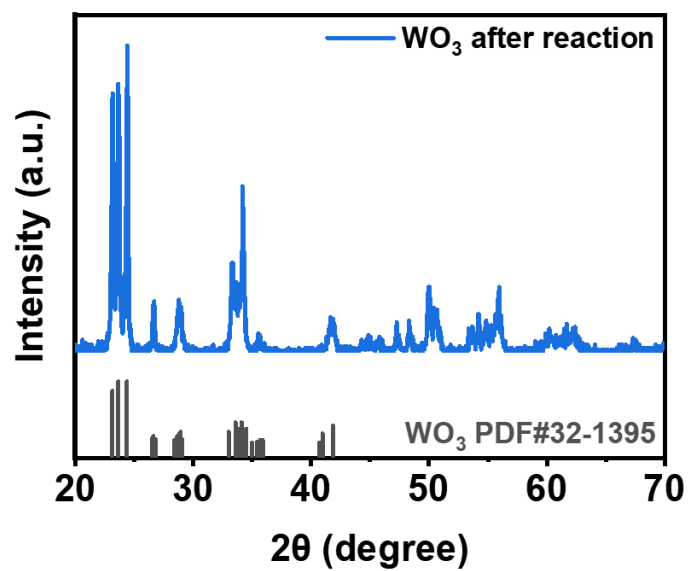

**Figure S24.** XRD pattern of WO<sub>3</sub> electrocatalyst after reusability test.

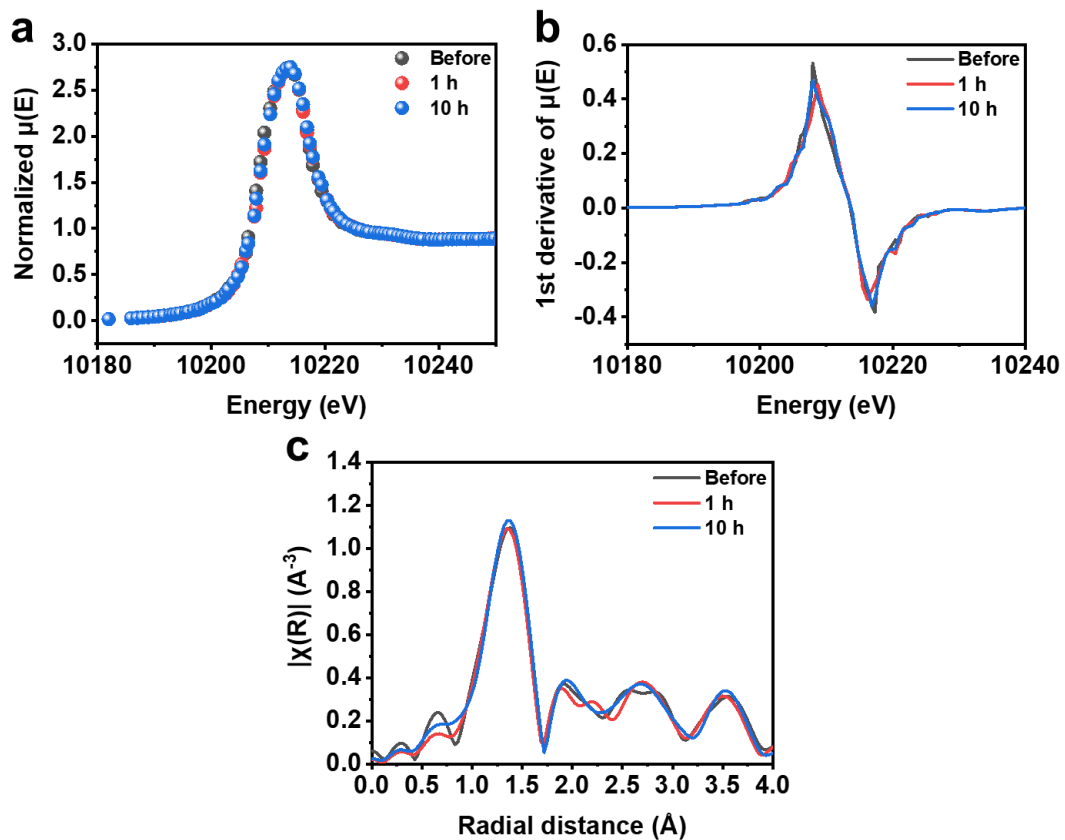

**Figure S25.** (a) XANES spectra, (b) the first derivative of XANES spectra of W  $L_3$ -edge, and (c)  $L_3$ -edge FT EXAFS spectra of the  $WO_3$  catalyst after electrolysis for 0 h, 1 h, and 10h, respectively.

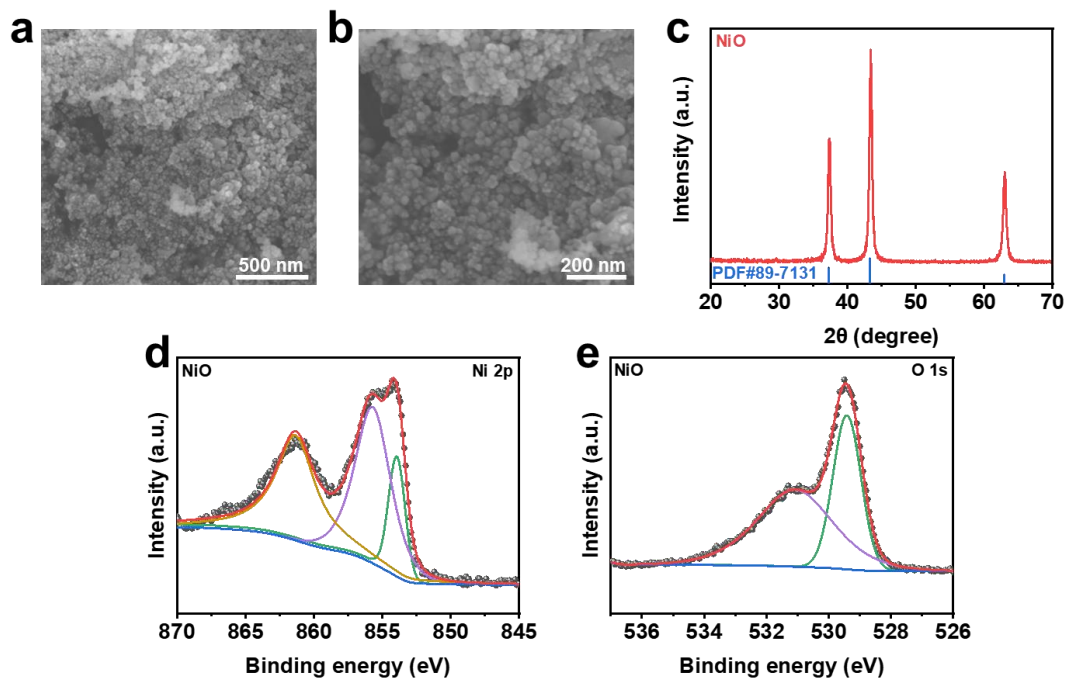

**Figure S26.** (a)-(b) SEM images and (c) XRD pattern of NiO electrocatalyst. XPS spectra of NiO electrocatalyst in the regions of (d) Ni 2p and (e) O 1s.

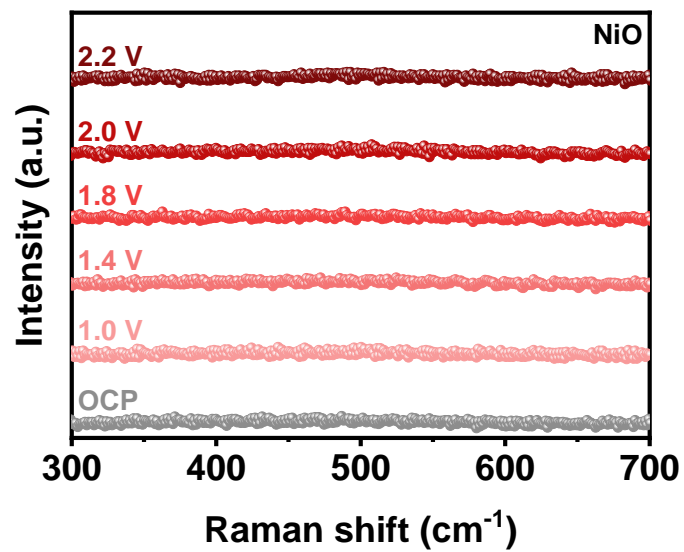

**Figure S27.** *In situ* electrochemical Raman spectra of NiO during  $\text{N}_2\text{H}_4$  synthesis.

The DFT-optimized intermediates and transition states for the formation of DMK-I by DMK and NH<sub>3</sub>.

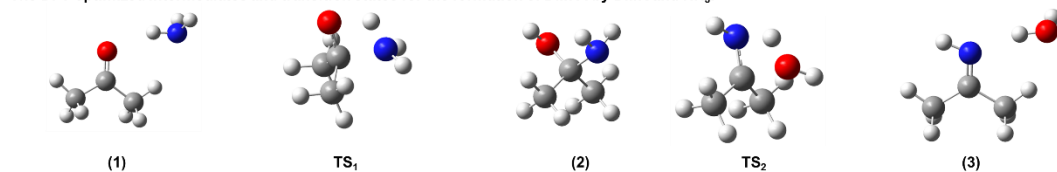

The DFT-optimized intermediates and transition states for the formation of MPK-I by MPK and NH<sub>3</sub>.

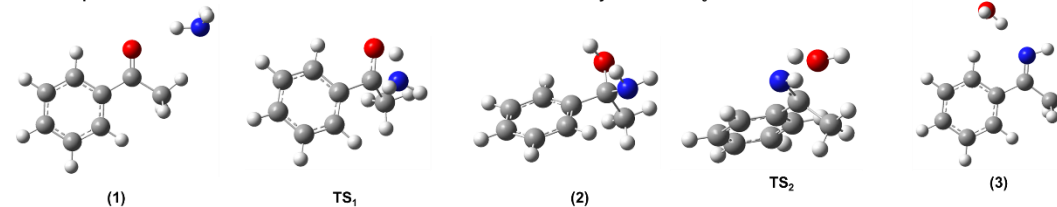

The DFT-optimized intermediates and transition states for the formation of DPK-I by DPK and NH<sub>3</sub>.

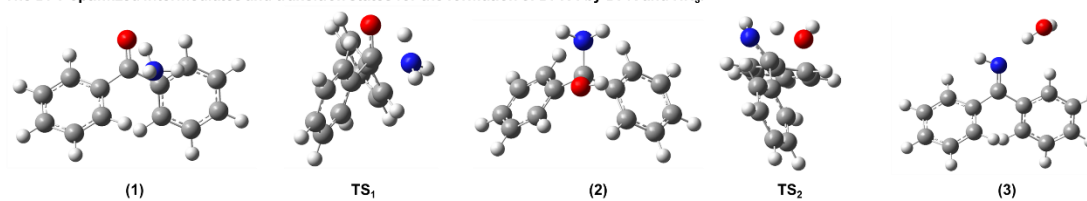

**Figure S28.** The DFT-optimized intermediates and transition states for the formation of different imines by ketones (DMK, MPK, and DPK) and NH<sub>3</sub>.

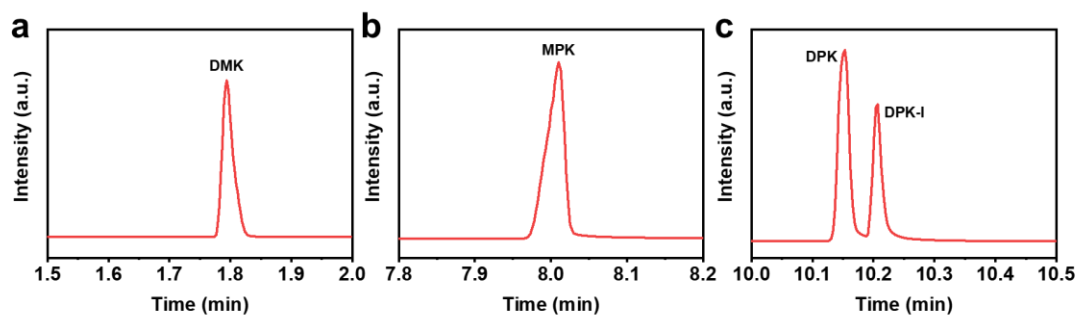

**Figure S29.** GC-MS analysis of imine formation from (a) DMK, (b) MPK, and (c) DPK ketones. Each ketone was mixed with  $\text{NH}_3$  in  $\text{CH}_2\text{Cl}_2$  and allowed to react overnight.

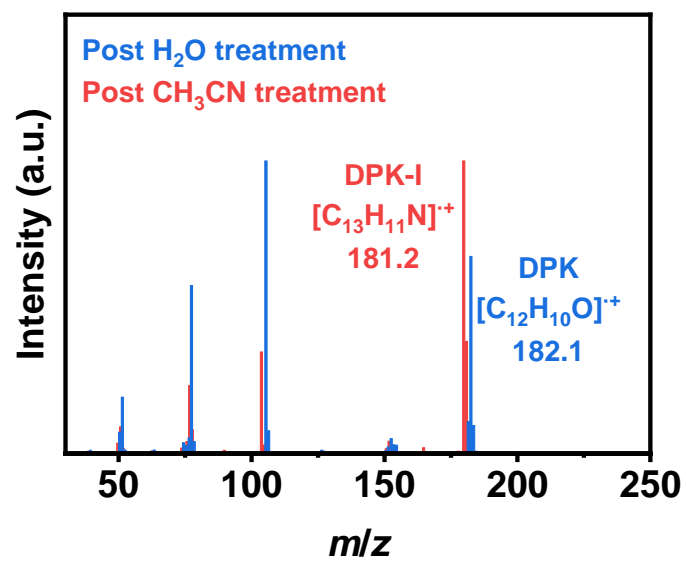

**Figure S30.** GC-MS spectra of DPK and DPK-I products after treating DPK-I in H<sub>2</sub>O and CH<sub>3</sub>CN solvents.

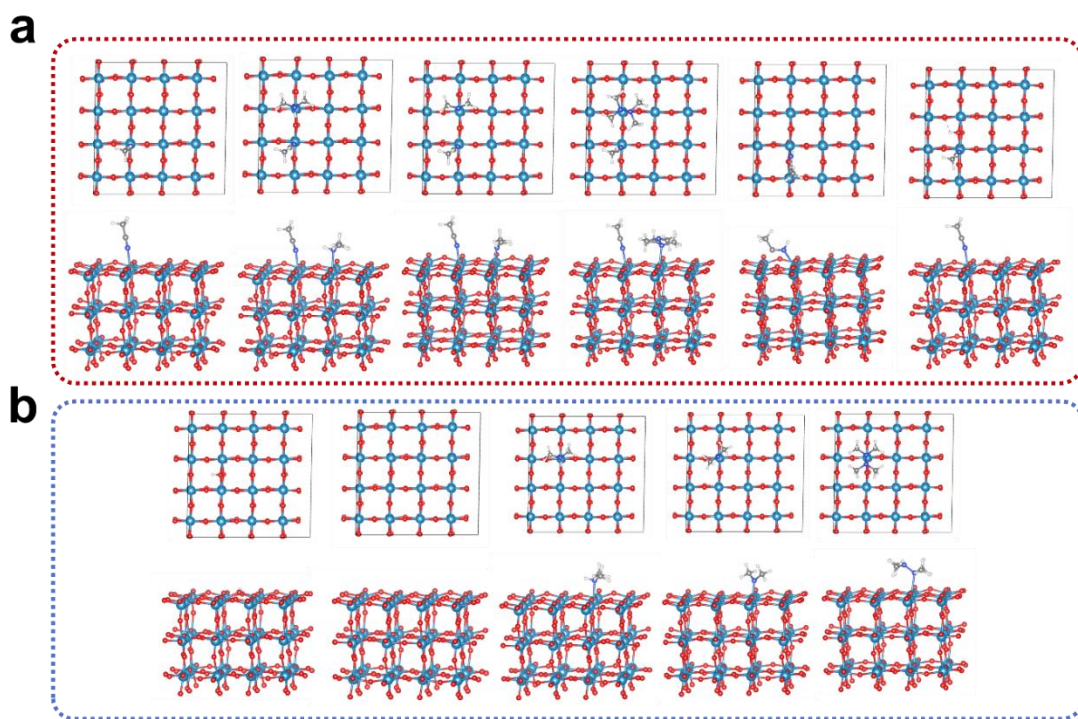

**Figure S31.** Atomic configurations of the intermediates on  $\text{WO}_3$  (200) model (a) with and (b) without  $\text{CH}_3\text{CN}$ .
