# Supplementary material for: Upgrading of nitrate to hydrazine through cascading electrocatalytic ammonia production with controllable N-N coupling
Source: PubMed Central journal article supplement — Nat Commun. 2024 Oct 3;15:8567. doi: 10.1038/s41467-024-52825-1 (PMC11450151; doi:10.1038/s41467-024-52825-1), 2024-10-03
Supplement: 41467_2024_52825_MOESM2_ESM.pdf [file 41467_2024_52825_MOESM2_ESM.pdf]

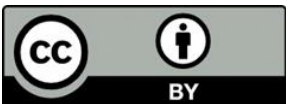

**Open Access** This file is licensed under a Creative Commons Attribution 4.0 International License, which permits use, sharing, adaptation, distribution and reproduction in any medium or format, as long as you give appropriate credit to the original author(s) and the source, provide a link to the Creative Commons license, and indicate if changes were made. In the cases where the authors are anonymous, such as is the case for the reports of anonymous peer reviewers, author attribution should be to 'Anonymous Referee' followed by a clear attribution to the source work. The images or other third party material in this file are included in the article's Creative Commons license, unless indicated otherwise in a credit line to the material. If material is not included in the article's Creative Commons license and your intended use is not permitted by statutory regulation or exceeds the permitted use, you will need to obtain permission directly from the copyright holder. To view a copy of this license, visit <http://creativecommons.org/licenses/by/4.0/>.

## REVIEWER COMMENTS

Reviewer #1 (Remarks to the Author):

Han et al. demonstrated an innovative approach for upgrading NO<sub>x</sub> wastes to valuable N<sub>2</sub>H<sub>4</sub> (salts) chemicals through the integration of NO<sub>x</sub> electroreduction to NH<sub>3</sub> and NH<sub>3</sub> oxidation to N<sub>2</sub>H<sub>4</sub>, employing a ketone mediator to moderate the N-N coupling process. They proposed lattice-oxygen-mediated dehydrogenation as the mechanism behind the superior electrochemical performance of the WO<sub>3</sub> catalyst compared to W and NiO. Overall, the results are interesting, offering a new pathway for NO<sub>x</sub> upcycling. I recommend this manuscript for publication in Nat. Commun. with minor revisions and the following points should be addressed.

1. The authors should provide additional discussion regarding their choice of WO<sub>3</sub> catalyst for synthesizing N<sub>2</sub>H<sub>4</sub>.
2. Is it possible DPK take part in reaction on the catalyst besides the formation of BPA?
3. In Figure S8, the authors demonstrated the isolation of N<sub>2</sub>H<sub>4</sub> salts with similar crystal phases to commercial standard samples. While interesting, providing detailed yield rates of the isolated products and including experimental details on product synthesis in the Method section would enhance clarity.
4. In Figure 4g, the authors should further compare the electrostatic potentials of DMK-I, MPK-I, and DPK-I with free NH<sub>3</sub> to elucidate the role of organic groups.
5. In Figure 5e, the authors compare the electrochemical performance in CH<sub>3</sub>CN and CH<sub>2</sub>Cl<sub>2</sub>, attributing the superior properties of acetonitrile solutions to hydrogen bonding. However, since the coherent properties of CH<sub>3</sub>CN and CH<sub>2</sub>Cl<sub>2</sub> differ significantly, the authors should provide further discussion on the different electrochemical performances observed using CH<sub>3</sub>CN and CH<sub>2</sub>Cl<sub>2</sub>.
6. WO<sub>3</sub> catalyst with W-O structure exhibited high performance for N-N coupling mediated by lattice-oxygen. Tuning the coordination structure of active sites is thus meaningful for breaking the limit of poor selectivity for the electrosynthesis of N<sub>2</sub>H<sub>4</sub>, which was demonstrated by the pioneer work has been reported in other electrocatalytic reactions I would like to suggest that some references should be discussed the introduction and discussion sections.

Reviewer #3 (Remarks to the Author):

Recommendation: publish after major revision

The authors demonstrated an interesting strategy to synthesise N<sub>2</sub>H<sub>4</sub> through C-N coupling between NH<sub>3</sub> and the ketone mediator and the N-N coupling of the imine. Convincing experiments were designed to prove the key roles of the WO<sub>3</sub> catalyst, the acetonitrile solvent and the DPK mediator. This work provides a new electrosynthesis strategy and demonstrates how reaction selectivity towards N-N coupling can be controlled by tuning the reaction parameters I can support the publication in Nat Commun if the following points can be addressed.

1. I don't think NO<sub>x</sub> reduction is really relevant to this study. The electrochemical conversion of NO<sub>x</sub> to NH<sub>3</sub> is a useful reaction but it is unrelated to the reaction is this work. The whole point of NO<sub>x</sub> reduction

is to generate NH<sub>3</sub>, and NH<sub>3</sub> is the actual starting material for the synthesis of N<sub>2</sub>H<sub>4</sub>. I would recommend the authors remove the part of NO<sub>x</sub> reduction and simply the procedures by just starting from NH<sub>3</sub>, which is a common starting material for organonitrogen synthesis.

2. The potential vs Ag<sup>+</sup>/Ag reference electrode is quite high. What is the overall cell voltage?

3. The control experiments for NiO, WO<sub>3</sub> and W catalysts are quite interesting. The authors should provide more in-depth investigations to reveal the roles of metal and oxygen, such as testing other metal oxide or metal hydroxide, and/or DFT calculations for the surface processes for NiO, WO<sub>3</sub> and W.

4. Figure 3f is quite confusing. What does it mean by 'ratio of conversion'? The three catalysts seem to all have 100% at initial condition, whereas in Figure 3d they have quite different conversion percentages. I guess the authors mean a normalised conversion? The authors should clarify it.

5. The discussions about the computation results in Figure 4c-f are not very convincing. The rate determining step should be from (1) to (2), where DMK has the smallest energy increase. The energy change from (2) to (3) is less important.

6. Following 5, the best way to confirm whether DPK-I is more stable than DMK-I and MPK-I would be measuring the relative amounts of imine vs ketone by NMR, when the three ketones are mixed with NH<sub>3</sub> in a solvent that can stabilise imine (e.g. CH<sub>2</sub>Cl<sub>2</sub>).

7. The DFT calculations in Figure 5f do not support the authors' hypothesis that CH<sub>3</sub>CN activates the N-H bond. The dehydrogenation step from R<sub>2</sub>CNH\* to R<sub>2</sub>CN\* becomes more endothermic in the presence of CH<sub>3</sub>CN. It's also quite surprising to see the RDS is the desorption of the final product. Under what electrochemical potential was the calculations were performed? How many CH<sub>3</sub>CN molecules were included in the model? And was the group without CH<sub>3</sub>CN calculated in vacuum?

8. The author should also cite some recent reports on the electrochemical C-N coupling between ketone and inorganic nitrogen species, such as ACS Catal. 2024, 14, 3287–3297; Nanoscale, 2024, 16, 2805-2819; Nat. Commun. 2023, 14 (1), 3057. DOI: 10.1038/s41467-023-38888-6; Angew. Chem. Int. Ed. 2023, e202305491. DOI: 10.1002/anie.202305491.

Reviewer #4 (Remarks to the Author):

In this work, the authors propose a novel concept of a process for upgrading nitrate (NO<sub>x</sub> compounds in general) to hydrazine, following a three-step process including: i) an initial electrochemical reduction of nitrates to ammonia; ii) a ketone-mediated N-N coupling step by electrochemical oxidation of ammonia; iii) a hydrolysis step to convert the chemical N-N intermediate to hydrazine. The approach is sound, considering the intrinsic high selectivity values demonstrated for the individual steps, making the overall process appealing. Moreover, the study provides valuable insights into the electrochemical pathways for N<sub>2</sub>H<sub>4</sub> production.

One important point about the work is that the title might be misleading as the approach does not follow a direct electrochemical step to reduce nitrate to hydrazine. In fact, the first step is a complementary aspect that might add value to the concept, but in general the source of NH<sub>3</sub> does not condition the main idea of the work, which is the electrocatalytic N-N coupling of NH<sub>3</sub> mediated by diphenyl ketone. Therefore, the authors should reconsider modifying the title to reflect the scope, mentioning that the source of NH<sub>3</sub> can potentially be obtained from methods other than electrocatalysis.

- Check figure S1. The scheme shows that you are using Air for dragging NH<sub>3</sub>. However, the main manuscript and the legends of Figure S1 indicate that argon is the gas used for the purpose.
- Check lines 98-101, as figure S3 is the UV-vis NH<sub>3</sub> calibration curve.
- With respect to the tests presented in figure 2, please indicate how long was the test at each applied potential.
- With respect to the five consecutive reutilization tests, please indicate the voltage at which the five cycles were performed.
- What is involved in the 88.7% Faradaic Efficiency? Only the conversion of NH<sub>3</sub> to N<sub>2</sub>H<sub>4</sub> or the FE of the whole system?
- Is it possible to ensure that all Nitrogen present in the N<sub>2</sub>H<sub>4</sub> comes from NH<sub>3</sub>, and not from CH<sub>3</sub>CN during oxidation?
- From the last part of the text, the nature of the intermediate designated as DPK-I is clear. However, it is first mentioned in the description of the in-situ ATR-FTIR measurement. It would be helpful to have a definition earlier in the text.
- In line with the previous comment, the paragraph related to the in-situ ATR-FTIR mentions the formation and consumption of DPK-I and correlates it with reverse peaks. However, that contradicts the previous comment about the DPK-I signal intensification during electrolysis. Please elaborate more or indicate where these trends are observed, as no transient evolution is included.
- With respect to lines 183-187, the negligible direct electrocatalytic NO<sub>x</sub> reduction to N<sub>2</sub>H<sub>4</sub> only proves the superior feasibility of the BPA-mediated N-N coupling from NH<sub>3</sub>, but certainly it doesn't state any specific requirement for NH<sub>3</sub> generation route.
- In relation to the Raman analysis: although the intercalation of protons is plausible mechanism, Raman spectra of proton intercalated WO<sub>3</sub> (H<sub>x</sub>WO<sub>3</sub>) in literature still show W-O related band. In this case, the progressive decrease of both O-W-O and W-O signals, mostly suggest a reduction of the surface. Related to this, the characterization of WO<sub>3</sub> after electrolysis does not show significant variation. At which voltage was the electrolysis of this sample carried out? How does it correlate with the results of in-situ Raman?
- Please correct the title of figure S27, as it corresponds to the in-situ Raman measurement with NiO.
- Please explain better how the availability of H<sub>2</sub>O correlates with the low activity of NiO.

Reviewer #5 (Remarks to the Author):

I co-reviewed this manuscript with one of the reviewers who provided the listed reports. This is part of the Nature Communications initiative to facilitate training in peer review and to provide appropriate recognition for Early Career Researchers who co-review manuscripts

## Responses to the comments of the reviewers

### Reviewer 1

Han *et al.* demonstrated an innovative approach for upgrading NO<sub>x</sub> wastes to valuable N<sub>2</sub>H<sub>4</sub> (salts) chemicals through the integration of NO<sub>x</sub> electroreduction to NH<sub>3</sub> and NH<sub>3</sub> oxidation to N<sub>2</sub>H<sub>4</sub>, employing a ketone mediator to moderate the N-N coupling process. They proposed lattice-oxygen-mediated dehydrogenation as the mechanism behind the superior electrochemical performance of the WO<sub>3</sub> catalyst compared to W and NiO. Overall, the results are interesting, offering a new pathway for NO<sub>x</sub> upcycling. I recommend this manuscript for publication in *Nat. Commun.* with minor revisions and the following points should be addressed.

**Response:** We thank the reviewer very much for the comment, and we have carefully revised the manuscript based on the comments.

1. The authors should provide additional discussion regarding their choice of WO<sub>3</sub> catalyst for synthesizing N<sub>2</sub>H<sub>4</sub>.

**Response:** We thank the reviewer again for the comment. According to the comment, we would like to discuss the choice of WO<sub>3</sub> catalyst. WO<sub>3</sub> offers several advantages as an electrocatalyst, including a high density of active sites, moderate absorption for intermediates, good stability, and cost-effectiveness. These properties make it particularly advantageous for facilitating various electrochemical reactions. Additionally, we have performed the electrosynthesis of N<sub>2</sub>H<sub>4</sub> using other catalysts, such as Pt/C, Fe<sub>2</sub>O<sub>3</sub>, CoO, and NiO. Among these catalysts, WO<sub>3</sub> demonstrated the best performance.

In the revised manuscript, we have discussed them by “Various catalysts commonly employed in electrocatalytic oxidation reactions, such as Pt/C, Ru/C, Pd/C, MnO<sub>2</sub>, Fe<sub>2</sub>O<sub>3</sub>, CoO, NiO, and CuO, were screened. Noble metal-based catalysts exhibited poor catalytic performance for the oxidation of NH<sub>3</sub> to BPA, with Ru/C showing no catalytic activity. In contrast, transition metal-based catalysts (MnO<sub>2</sub>, Fe<sub>2</sub>O<sub>3</sub>, CoO, NiO, CuO) can catalyze the reaction, albeit with inferior performance compared to WO<sub>3</sub>. WO<sub>3</sub> exhibited the highest conversion of NO<sub>x</sub>-derived NH<sub>3</sub> to BPA after electrolysis, as

illustrated in Figure S4. As a result,  $\text{WO}_3$  was identified as the optimal catalyst for  $\text{N}_2\text{H}_4$  synthesis because of its numerous active sites and suitable binding affinity for intermediates.” Please see them in Page 4 in the revised manuscript.

2. Is it possible DPK take part in reaction on the catalyst besides the formation of BPA?

**Response:** We thank the reviewer again for the comment. According to the GC-MS analysis of the electrolyte after electrolysis (Figure S5a), only BPA were detected as organic products. Consequently, the selectivity of the DKP-to-BPA conversion exceeds 99.9% under all applied potentials (Figure 2a), with no detectable by-products. Additionally, as shown in Figure S13, we demonstrated that DPK is highly inert in the absence of  $\text{NH}_3$ .

In the revised manuscript, we have discussed them by “The molecular weight of 360.1 determined by gas chromatography-mass spectrometry (GC-MS) showed that the product has the molecular formula of  $\text{C}_{26}\text{H}_{20}\text{N}_2$  (Figure S5). In addition, the selectivity of DPK-mediated N-N coupling was as high as >99.9%, since no detectable by-product was observed in GC-MS.” and “Furthermore, the findings from the linear sweep voltammetry (LSV) investigation in Figure S13 suggested the sluggish nature of the DPK reaction in the absence of  $\text{NH}_3$ , further supporting the preference for N-N coupling based on DPK-I intermediates.” Please see them in Page 5 and Page 7 in the revised manuscript.

3. In Figure S8, the authors demonstrated the isolation of  $\text{N}_2\text{H}_4$  salts with similar crystal phases to commercial standard samples While interesting, providing detailed yield rates of the isolated products and including experimental details on product synthesis in the Method section would enhance clarity.

**Response:** We thank the reviewer again for the comment. According to the comment, we have supplemented the experimental details of recrystallization of  $\text{N}_2\text{H}_4$  salts by “The aqueous  $\text{N}_2\text{H}_4$  solution was placed in a distillation flask, and the distillation apparatus was assembled. The solution was gradually heated to distill off the water,

maintaining the temperature below the boiling point of hydrazine (114 °C) to prevent its loss. The concentrated hydrazine solution was then collected for further use. In a well-ventilated fume hood, concentrated HCl was added dropwise to the concentrated hydrazine solution with continuous stirring. The addition rate was carefully controlled to manage the exothermic reaction. HCl was added until the solution reaches a pH of < 1. The reaction mixture was cooled in an ice bath to promote the crystallization. The mixture is left in the ice bath for 2 hours to ensure complete crystallization. The hydrazine hydrochloride crystals were then isolated by vacuum filtration. The crystals were washed with a small volume of cold ethanol or acetone to remove impurities. Finally, the washed crystals were transferred to a drying oven set at 60 °C.” in the supplementary information of the revised manuscript. In addition, we discussed the yield rates of the isolated products in the revised manuscript by “After recrystallization of N<sub>2</sub>H<sub>4</sub>-based products, we could obtain N<sub>2</sub>H<sub>4</sub>·HCl and (N<sub>2</sub>H<sub>4</sub>)<sub>2</sub>·H<sub>2</sub>SO<sub>4</sub> products with a yield of >60%, which exhibited similar X-ray diffraction (XRD) patterns with commercial standard samples (Figure S8).” Please see them in Page 3 of the supplementary information and Page 5 in the revised manuscript.

4. In Figure 4g, the authors should further compare the electrostatic potentials of DMK-I, MPK-I, and DPK-I with free NH<sub>3</sub> to elucidate the role of organic groups.

**Response:** We thank the reviewer again for the comment. Compared with free NH<sub>3</sub>, condensation into imine with ketone can significantly reduce the electrostatic potentials of N atom, which can further prove the importance of DPK for the synthesis of N<sub>2</sub>H<sub>4</sub>.

We further discussed this point by “Furthermore, the electrostatic potentials ( $\phi_{\max}$ ) on the N atom side exhibited significant disparities for imines substituted with different groups:  $\phi_{\max, \text{DPK}} < \phi_{\max, \text{MPK}} < \phi_{\max, \text{DMK}} < \phi_{\max, \text{NH}_3}$  (Figure 4c). This discrepancy could suggest that DPK-I has the capability to redistribute the charge density on the N atom of the imine group, thereby enhancing molecular stability.” in the revised manuscript. Please see it in Page 11 in the revised manuscript.

5. In Figure 5e, the authors compare the electrochemical performance in CH<sub>3</sub>CN and



CH<sub>2</sub>Cl<sub>2</sub>, attributing the superior properties of acetonitrile solutions to hydrogen bonding. However, since the coherent properties of CH<sub>3</sub>CN and CH<sub>2</sub>Cl<sub>2</sub> differ significantly, the authors should provide further discussion on the different electrochemical performances observed using CH<sub>3</sub>CN and CH<sub>2</sub>Cl<sub>2</sub>.

**Response:** We thank the reviewer again for the comment. Generally, electrolyte solution includes supporting electrolytes, substrates, and solvents, forming a very complex system. Different solvents possess distinct physicochemical properties, which result in varying electrochemical behaviors in electrocatalytic reactions. In this work, we combined a variety of research methods, including <sup>1</sup>H NMR, ATR-FTIR, controlled experiments and DFT calculations demonstrated in Figure 5, to attribute the excellent performance of CH<sub>3</sub>CN solvent to the existence of hydrogen bond between CH<sub>3</sub>CN molecules and DPK-I intermediates.

In the revised manuscript, we have discussed them by “As a result, while we acknowledge the intrinsic complexity of solvent systems, the existence of hydrogen bond interaction between CH<sub>3</sub>CN and DPK-I intermediates enhance the activation of N-H bonds, facilitating the N-N coupling of DPK-I intermediates, thus promoting BPA formation.” Please see it in Page 12 in the revised manuscript.

6. WO<sub>3</sub> catalyst with W-O structure exhibited high performance for N-N coupling mediated by lattice-oxygen. Tuning the coordination structure of active sites is thus meaningful for breaking the limit of poor selectivity for the electrosynthesis of N<sub>2</sub>H<sub>4</sub>, which was demonstrated by the pioneer work has been reported in other electrocatalytic reactions. I would like to suggest that some references should be discussed the introduction and discussion sections.

**Response:** We thank the reviewer again for the comment. According to the comment, we have added some useful references, Ref. 37, Ref. 38, Ref. 39, and Ref. 40 into the revised manuscript (*Science*, **2024**, 384, 670-676; *Angew. Chem. Int. Ed.*, **2024**, e202406947; *Nat. Commun.*, **2022**, 13, 5382; *Nat. Commun.*, **2023**, 14, 4209) and further discussed the importance of W-O structure in WO<sub>3</sub> catalyst in the revised manuscript by “The coordination structure of W-O active sites in the WO<sub>3</sub> catalyst is

crucial for overcoming the limitations of poor selectivity in the electrosynthesis of  $\text{N}_2\text{H}_4$ .  $\text{WO}_3$  can be rapidly and reversibly doped with hydrogen to form  $\text{H}_x\text{WO}_3$  phase, significantly influencing reaction barriers and pathways, thereby enhancing catalytic performance.” Please see them in Page 9 in the revised manuscript.

### Reviewer 3

Recommendation: publish after major revision

The authors demonstrated an interesting strategy to synthesize  $N_2H_4$  through C-N coupling between  $NH_3$  and the ketone mediator and the N-N coupling of the imine. Convincing experiments were designed to prove the key roles of the  $WO_3$  catalyst, the acetonitrile solvent and the DPK mediator. This work provides a new electrosynthesis strategy and demonstrates how reaction selectivity towards N-N coupling can be controlled by tuning the reaction parameters I can support the publication in *Nat. Commun.* if the following points can be addressed.

**Response:** We thank the reviewer very much for the comment, which help and guide us to improve our work greatly. We have answered the questions from the reviewers and revised the manuscript on the basis of the comments.

1. I don't think  $NO_x$  reduction is really relevant to this study. The electrochemical conversion of  $NO_x$  to  $NH_3$  is a useful reaction but it is unrelated to the reaction in this work. The whole point of  $NO_x$  reduction is to generate  $NH_3$ , and  $NH_3$  is the actual starting material for the synthesis of  $N_2H_4$ . I would recommend the authors remove the part of  $NO_x$  reduction and simply the procedures by just starting from  $NH_3$ , which is a common starting material for organonitrogen synthesis.

**Response:** We thank the reviewer again for the comment. As the reviewer points out, the part of  $NH_3$ -to- $N_2H_4$  occupies a larger space, and  $NH_3$  is the actual starting material for the synthesis of  $N_2H_4$ . However, considering the source of  $NH_3$ , such as using front-end  $NO_x$  as N source, in this process is novel and holistic, which is also innovative in the evolving field of  $NO_x$  upgrading. Traditional  $NO_x$  reduction methods typically yield only two thermodynamically stable products,  $N_2$  and  $NH_3$ , with satisfactory selectivity. However, the production of value-added  $N_2H_4$  from  $NO_x$  has not been previously reported. In our study, we demonstrated the synthesis of  $N_2H_4$ , thereby introducing a novel perspective to this field. We employed a cascading strategy to synthesize  $N_2H_4$  from  $NO_x$ : first converting  $NO_x$  to  $NH_3$ , and subsequently converting  $NH_3$  to  $N_2H_4$  using DPK.

To avoid confusion, we have changed the title of our manuscript into “Upgrading of nitrate to hydrazine through cascading electrocatalytic ammonia production with controllable N-N coupling” in the revised version to better reflect this focus. Please see Page 1 in the revised manuscript.

2. The potential vs Ag/Ag<sup>+</sup> reference electrode is quite high. What is the overall cell voltage?

**Response:** We thank the reviewer again for the comment. The overall cell voltage at the optimal condition of 2.0 V vs Ag/Ag<sup>+</sup> was found to be 4.1 V. We acknowledge that the cell voltage during N<sub>2</sub>H<sub>4</sub> synthesizing is high and it is a very challenging project to reduce the overall potential for minimize energy input.

In the revised manuscript, we have discussed this point by “At 2.0 V, NH<sub>3</sub> achieved the conversion rate to BPA as high as 98.5% and the overall cell voltage was found to be 4.1 V.” Please see this in Page 6.

3. The control experiments for NiO, WO<sub>3</sub> and W catalysts are quite interesting. The authors should provide more in-depth investigations to reveal the roles of metal and oxygen, such as testing other metal oxide or metal hydroxide, and/or DFT calculations for the surface processes for NiO, WO<sub>3</sub> and W.

**Response:** We thank the reviewer again for the comment. According to the comment, we have further expanded the scope of our catalyst screening, and the conclusion remain unchanged. As shown in Figure 3 and Figure S4 of the revised manuscript, we have tested the oxidation of NH<sub>3</sub> to BPA with DPK using a wider range of electrocatalysts besides optimal WO<sub>3</sub>, including Pt/C, Ru/C, Pd/C, MnO<sub>2</sub>, Fe<sub>2</sub>O<sub>3</sub>, CoO, NiO, and CuO. Generally, the noble metals-based catalysts exhibited poor catalytic performance. The transition metal-based catalysts (MnO<sub>2</sub>, Fe<sub>2</sub>O<sub>3</sub>, CoO, NiO, and CuO) can catalyze the reaction, but their performance is inferior to that of the optimal WO<sub>3</sub> catalyst.

Generally, Ni-based catalysts show excellent performance in the electrocatalytic oxidation of aqueous solutions (such as alcohols, aldehydes, and other organic

molecules). This is because NiO reacts with H<sub>2</sub>O to form NiOOH active sites, which have a high oxidation state of Ni, thereby promoting the oxidation of organic molecules. However, in acetonitrile solvent, the absence of water molecules prevents the formation of NiOOH, inhibiting the activity of Ni-based catalysts. In contrast, the WO<sub>3</sub> catalyst can promote the N-H bond dehydrogenation process in acetonitrile through the mediation of lattice oxygen (as described in Figure 3 of our manuscript). Thus, the WO<sub>3</sub> catalyst outperforms the Ni catalyst due to this lattice oxygen-mediated dehydrogenation mechanism.

In the revised manuscript, we have discussed them by “Various catalysts commonly employed in electrocatalytic oxidation reactions, such as Pt/C, Ru/C, Pd/C, MnO<sub>2</sub>, Fe<sub>2</sub>O<sub>3</sub>, CoO, NiO, and CuO, were screened. Noble metal-based catalysts exhibited poor catalytic performance for the oxidation of NH<sub>3</sub> to BPA, with Ru/C showing no catalytic activity. In contrast, transition metal-based catalysts (MnO<sub>2</sub>, Fe<sub>2</sub>O<sub>3</sub>, CoO, NiO, CuO) can catalyze the reaction, albeit with inferior performance compared to WO<sub>3</sub>. WO<sub>3</sub> exhibited the highest conversion of NO<sub>x</sub>-derived NH<sub>3</sub> to BPA after electrolysis, as illustrated in Figure S4.” Please see Page 5.

4. Figure 3f is quite confusing. What does it mean by ‘ratio of conversion’? The three catalysts seem to all have 100% at initial condition, whereas in Figure 3d they have quite different conversion percentages. I guess the authors mean a normalized conversion? The authors should clarify it.

**Response:** We thank the reviewer again for the comment. The normalized conversion was used when discussing the results shown in Figure 3f. In the revised manuscript, we have corrected the figure and please see it in Page 3 in the revised manuscript.

In the revised manuscript, we have discussed it by “As illustrated in Figure 3f, after Li<sup>+</sup> poisoning treatment, NiO and WO<sub>3</sub> catalysts experienced a substantial decrease in activity attributable to the strong coordination between Li<sup>+</sup> and lattice oxygen in NiO and WO<sub>3</sub> (Figure 3g).” Please see Page 10.

5. The discussions about the computation results in Figure 4c-f are not very

convincing. The rate determining step should be from (1) to (2), where DMK has the smallest energy increase. The energy change from (2) to (3) is less important.

**Response:** We thank the reviewer again for the comment. According to the comment, we reconsidered the influence of the transition state structure on the reaction steps and recalculated the energy of the relevant steps. Our revised calculations support the hypothesis that DPK is the most favorable for the formation of imines.

In the revised manuscript, we have discussed them by “To investigate the influence of ketone mediator molecules with varying electronic and steric properties (Figure 4b and Figure S28), we examined the energy changes involved in the condensation of three ketone with  $\text{NH}_3$ , such as dimethyl ketone (DMK), methyl phenyl ketone (MPK) and DPK. This led to the formation of imines, namely dimethyl ketone imine (DMK-I), methyl phenyl ketone imine (MPK-I), and DPK-I, following the removal of water molecules through the corresponding intermediates. The reaction transition state energy barriers from (1) to (2) for the ketones of DMK, MPK, and DPK were approximately the same, being 39.6, 39.1, and 39.4  $\text{kcal mol}^{-1}$ , respectively. However, for the reaction process from (2) to (3), the transition state energy barriers decreased gradually to 52.0, 48.2, and 44.4  $\text{kcal mol}^{-1}$ , respectively, indicating that the activity of the DMK-I, MPK-I, and DPK-I intermediates progressively increased. Hence, DPK exhibited a higher capacity for generating DPK-I due to the boosted dehydration process, which could serve as the mediator for single N-N coupling.” Please see Page 11 of the revised manuscript.

6. Following 5, the best way to confirm whether DPK-I is more stable than DMK-I and MPK-I would be measuring the relative amounts of imine vs ketone by NMR, when the three ketones are mixed with  $\text{NH}_3$  in a solvent that can stabilize imine (e.g.  $\text{CH}_2\text{Cl}_2$ ).

**Response:** We thank the reviewer again for the comment. According to the comment, we also investigated the stability of the imine species derived from DPK-I, DMK-I, and MPK-I, and GC-MS analysis was used due to its lower detection limit. We mixed each ketone with  $\text{NH}_3$  in  $\text{CH}_2\text{Cl}_2$  and allowed the reaction to proceed overnight before

subjecting the mixture to GC-MS. Our results indicated that no distinct imine species were observed for DMK and MPK. In contrast, for DPK, approximately 30% conversion to DPK-I species was detected. This suggested that the stability of DPK-I is significantly higher than that of DMK-I and MPK-I.

In the revised manuscript, we have discussed them by “The superior stability of DPK-I compared to DMK-I and MPK-I was further confirmed by GC-MS analysis (Figure S29). This analysis revealed that only DPK-I was detectable after mixing the corresponding ketone and NH<sub>3</sub>.” Please see Page 11 in the revised manuscript.

7. The DFT calculations in Figure 5f do not support the authors' hypothesis that CH<sub>3</sub>CN activates the N-H bond. The dehydrogenation step from R<sub>2</sub>CNH\* to R<sub>2</sub>CN\* becomes more endothermic in the presence of CH<sub>3</sub>CN. It's also quite surprising to see the RDS is the desorption of the final product. Under what electrochemical potential was the calculations were performed? How many CH<sub>3</sub>CN molecules were included in the model? And was the group without CH<sub>3</sub>CN calculated in vacuum?

**Response:** We thank the reviewer again for the comment. According to the comment, we have supplemented the electrochemical potential role in the simulation and discussed the calculation process in more detailed way in the revised manuscript, which can be found in the following.

- 1) Upon reevaluation, we investigated the catalytic process mediated by CH<sub>3</sub>CN by applying a bias voltage range of 0.5-2.5 V. This adjustment resulted in changes of the free energy of reaction intermediates that support our initial hypothesis. Notably, the introduction of CH<sub>3</sub>CN lowered the energy barrier for the dehydrogenation step and facilitated the overall reaction pathway. For example, when a bias voltage of 2.0 V was applied, the energy required for R<sub>2</sub>CNH\* dehydrogenation to R<sub>2</sub>CN\* decreased by 0.59 eV and the free energy for N-N coupling was reduced by 0.65 eV with CH<sub>3</sub>CN was present. Furthermore, we acknowledge that the endothermic desorption of BPA product, which is a common phenomenon in electrocatalysis (*Nat. Commun.* **2023**, *14*, 3634; *Nat. Commun.* **2023**, *14*, 8036; *Proc Natl Acad Sci*

*USA* **2023**, *120*, e2311149120; *Proc Natl Acad Sci USA* **2023**, *120*, e2312550120; *Adv. Mater.* **2023**, *36*, 2309470).

2) In our model, a single CH<sub>3</sub>CN molecule was placed on the surface, and all simulations were conducted under vacuum conditions. These calculations have underscored the role of catalyst composition and structure in the observed effects, which agree with the experimental findings with theoretical calculations used to support and explain these results. Considering solvation effects, we further modified our catalyst models by incorporating one CH<sub>3</sub>CN molecule on the surface. However, due to current computational limitations, it remains challenging to incorporate a larger number of CH<sub>3</sub>CN molecules to simulate a continuous hydrogen bond network and compute reaction pathways within such a network.

We agree with the referee that exploring solvent effects on reactions is crucial for computational simulations that closely mimic real systems, but this remains a significant computational challenge requiring advancements in methodology and capabilities. Fortunately, these challenges do not affect the conclusions drawn in our paper regarding the superior electrochemical performance of WO<sub>3</sub> in CH<sub>3</sub>CN solvent, as these conclusions were based on comparisons among different catalysts and electrolytes.

In the revised manuscript, we have discussed them by “Density Functional Theory (DFT) analysis shown in Figure 5f and Figure S30 revealed that in the presence of CH<sub>3</sub>CN molecules, the energy required for R<sub>2</sub>CNH\* dehydrogenation to R<sub>2</sub>CN\* decreased by 0.59 eV compared to the absence of CH<sub>3</sub>CN molecules, and the Gibbs free energy for the single N-N coupling step was reduced by 0.65 eV in the presence of CH<sub>3</sub>CN. Furthermore, the energy barrier along the reaction path with CH<sub>3</sub>CN was generally smoother than without CH<sub>3</sub>CN. Hence, DFT calculations could elucidate the enhanced performance of DPK-I to BPA with the assistance of CH<sub>3</sub>CN solvent.” Please see Page 13 in the revised manuscript.

8. The author should also cite some recent reports on the electrochemical C-N coupling between ketone and inorganic nitrogen species, such as *ACS Catal.* **2024**,



14, 3287-3297; *Nanoscale*, **2024**, 16, 2805-2819; *Nat. Commun.* **2023**, 14, 3057; *Angew. Chem. Int. Ed.* **2023**, 62, e202305491.

**Response:** We thank the reviewer again for the comment. The recommended references are very useful and we have added them as Ref. 9, Ref. 10, Ref. 12, and Ref. 13, respectively, in the revised manuscript. We have discussed these references by “The excessive emission of nitrogen oxides (NO<sub>x</sub>) poses environmental and human health concerns, but they also serve as renewable nitrogen sources for the synthesis of value-added chemicals driven by clean energy.” and “NO<sub>x</sub> electroreduction is a multi-electron transfer process involving various intermediates, most of which are unstable and fleeting.” in the revised manuscript. Please see them in Page 2 in the revised manuscript.

#### **Reviewer 4**

In this work, the authors propose a novel concept of a process for upgrading nitrate ( $\text{NO}_x$  compounds in general) to hydrazine, following a three-step process including: i) an initial electrochemical reduction of nitrates to ammonia; ii) a ketone-mediated N-N coupling step by electrochemical oxidation of ammonia; iii) a hydrolysis step to convert the chemical N-N intermediate to hydrazine. The approach is sound, considering the intrinsic high selectivity values demonstrated for the individual steps, making the overall process appealing. Moreover, the study provides valuable insights into the electrochemical pathways for  $\text{N}_2\text{H}_4$  production.

**Response:** We appreciate the valuable feedback from the reviewer and have thoroughly revised the manuscript in accordance with the comments.

One important point about the work is that the title might be misleading as the approach does not follow a direct electrochemical step to reduce nitrate to hydrazine. In fact, the first step is a complementary aspect that might add value to the concept, but in general the source of  $\text{NH}_3$  does not condition the main idea of the work, which is the electrocatalytic N-N coupling of  $\text{NH}_3$  mediated by diphenyl ketone. Therefore, the authors should reconsider modifying the title to reflect the scope, mentioning that the source of  $\text{NH}_3$  can potentially be obtained from methods other than electrocatalysis.

**Response:** We thank the reviewer again for the comment. As the reviewer points out, the part of  $\text{NH}_3$ -to- $\text{N}_2\text{H}_4$  occupies a larger space, and  $\text{NH}_3$  is the actual starting material for the synthesis of  $\text{N}_2\text{H}_4$ . However, considering the source of  $\text{NH}_3$ , such as using front-end  $\text{NO}_x$  as N source, in this process is novel and holistic, which is also innovative in the evolving field of  $\text{NO}_x$  upgrading. Traditional  $\text{NO}_x$  reduction methods typically yield only two thermodynamically stable products,  $\text{N}_2$  and  $\text{NH}_3$ , with satisfactory selectivity. However, the production of value-added  $\text{N}_2\text{H}_4$  from  $\text{NO}_x$  has not been previously reported. In our study, we demonstrated the synthesis of  $\text{N}_2\text{H}_4$ , thereby introducing a novel perspective to this field. We employed a cascading strategy to synthesize  $\text{N}_2\text{H}_4$  from  $\text{NO}_x$ : first converting  $\text{NO}_x$  to  $\text{NH}_3$ , and subsequently converting  $\text{NH}_3$  to  $\text{N}_2\text{H}_4$  using DPK.

To avoid confusion, we have changed the title of our manuscript into “Upgrading of nitrate to hydrazine through cascading electrocatalytic ammonia production with controllable N-N coupling” in the revised version to better reflect this focus. Please see Page 1 in the revised manuscript.

1. Check figure S1. The scheme shows that you are using air for dragging NH<sub>3</sub>. However, the main manuscript and the legends of Figure S1 indicate that argon is the gas used for the purpose.

**Response:** We thank the reviewer again for the comment. We apologize for the error in Figure S1. In this work, to avoid introducing other impurities to affect the reaction, we utilized Ar as the load gas to transfer NH<sub>3</sub> from the aqueous system to the organic solution. We have corrected Figure S1 in the revised manuscript. Please see Page 6 in the supplementary information.

2. Check lines 98-101, as figure S3 is the UV-vis NH<sub>3</sub> calibration curve.

**Response:** We thank the reviewer again for the comment. According to the comment, we have re-described this point by “The electrocatalytic reduction of NO<sub>x</sub> to NH<sub>3</sub>, utilizing aqueous NO<sub>3</sub><sup>-</sup> as an example, was performed using an H-type cell, employing commercial oxide-derived copper (OD Cu) as catalyst (Figure S2). The NH<sub>3</sub> product obtained from electroreduction was detected using the well-established salicylate method as is demonstrated in Figure S3.” in the revised manuscript to avoid misunderstanding. Please see it in Page 4 in the revised manuscript.

3. With respect to the tests presented in figure 2, please indicate how long was the test at each applied potential.

**Response:** We thank the reviewer again for the comment. According to the comment, we have discussed the electrolysis time in the revised manuscript by “The electrocatalytic N-N coupling performance using NO<sub>x</sub>-derived NH<sub>3</sub> and DPK in CH<sub>3</sub>CN solvent was evaluated through electrolysis conducted over WO<sub>3</sub> catalyst within a voltage range of 1.2 V to 2.2 V vs Ag/Ag<sup>+</sup> for 10 h (Figure S10).” Please see them in

Page 6 in the revised manuscript.

4. With respect to the five consecutive reutilization tests, please indicate the voltage at which the five cycles were performed.

**Response:** We thank the reviewer again for the comment. The reutilization tests were conducted at optimal 2.0 V in our work. We have discussed this point by “After being employed five times consecutively at optimal 2.0 V, the  $\text{WO}_3$  catalyst maintained a stable current during electrolysis, achieving a  $\text{NH}_3$  to BPA conversion rate of 99.2% and a BPA FE of 94.7% (Figure S11).” in the revised manuscript. In addition, we have presented the applied potential in Figure S11 in the supplementary information. Please see them in Page 6 in the revised manuscript and Page 16 in the supplementary information.

5. What is involved in the 88.7% Faradaic Efficiency? Only the conversion of  $\text{NH}_3$  to  $\text{N}_2\text{H}_4$  or the FE of the whole system?

**Response:** We thank the reviewer again for the comment. In this work, we demonstrated a cascade strategy to upgrade  $\text{NO}_3^-$  to  $\text{N}_2\text{H}_4$  with an excellent overall selectivity of 88.7%. It should be noted that this 88.7% is not the FE of any single electrochemical reaction, but rather the conversion rate of  $\text{NO}_3^-$  to  $\text{N}_2\text{H}_4$ . We converted 88.7% of the initial  $\text{NO}_3^-$  substrate to  $\text{N}_2\text{H}_4$  product through the demonstrated strategy.

In the revised manuscript, we have emphasized it by “As a result, this tandem process exhibits remarkable efficiency, and the overall selectivity of  $\text{NO}_x$ -to- $\text{N}_2\text{H}_4$  was 88.7%.” Please see Page 5.

6. Is it possible to ensure that all nitrogen present in the  $\text{N}_2\text{H}_4$  comes from  $\text{NH}_3$ , and not from  $\text{CH}_3\text{CN}$  during oxidation?

**Response:** We thank the reviewer again for the comment. According to the comment, we have supplemented the  $^{15}\text{N}$  isotopic labeling experiments in the revised manuscript. The MS analysis revealed the presence of a signal at  $m/z$  of 362.1, which could be attributed to the  $^{15}\text{N}$ -labeled BPA. This finding could further support the conclusion that

the nitrogen source for both BPA and  $\text{N}_2\text{H}_4$  was derived from the nitrate substrates, ruling out the influence of other contaminants under the experimental conditions.

In the revised manuscript, we have shown the result as Figure S5 and discussed it by “By employing  $\text{K}^{15}\text{NO}_3$  as the reactant, we detected a molecular ion peak of the product at 362.1 (Figure S5e), precisely matching the calculated molecular weight of  $\text{C}_{26}\text{H}_{20}^{15}\text{N}_2$ . This finding confirmed that the nitrogen source in BPA was derived from nitrate.” Please see Page 5 in the revised manuscript.

7. From the last part of the text, the nature of the intermediate designated as DPK-I is clear. However, it is first mentioned in the description of the in-situ ATR-FTIR measurement. It would be helpful to have a definition earlier in the text.

**Response:** We thank the reviewer again for the comment. According to the comment, we have added the corresponding description in the revised manuscript: “The evolution of intermediates during BPA formation was further studied utilizing *in situ* ATR-FTIR spectroscopy. The peaks at  $1674\text{ cm}^{-1}$  (Figure 2c),  $1597\text{ cm}^{-1}$  (Figure 2d),  $1570\text{ cm}^{-1}$  (Figure 2d), and  $1450\text{ cm}^{-1}$  (Figure 2e) corresponded to the  $\text{H}_2\text{O}$  produced after C-N condensation between  $\text{NH}_3$  and DPK, the active C-N bonds in  $\text{Ph}_2\text{CN}^*$  intermediates, the DPK mediator consumed during the reaction, and the diphenyl ketone imine (DPK-I) intermediates respectively.” Please see them in Page 6 in the revised manuscript.

8. In line with the previous comment, the paragraph related to the in-situ ATR-FTIR mentions the formation and consumption of DPK-I and correlates it with reverse peaks. However, that contradicts the previous comment about the DPK-I signal intensification during electrolysis. Please elaborate more or indicate where these trends are observed, as no transient evolution is included.

**Response:** We thank the reviewer again for the comment. It was observed that the intensity of signals of  $\text{H}_2\text{O}$  and C=N increased during electrolysis, but that of C=O and N-H were decreased. The signals indicated the concentration of species containing C=N (including  $\text{Ph}_2\text{CN}^*$  and BPA) was increased. In contrast, the DPK and DPK-I signals corresponding to C=O and N-H, respectively, were gradually diminished. In addition,

the C=N structure exists both before and after the N-N coupling, resulting in the gradual enhancement of the C=N signal.

In the revised manuscript, we have discussed them by “Moreover, the observed signals of H<sub>2</sub>O and Ph<sub>2</sub>CN\*/DPK-I (C=N) was intensified during electrolysis, indicating an increased concentration of these intermediates in the solution, while the signal corresponding to DPK (C=O) and DPK-I (N-H) demonstrated reverse peaks, confirming its consumption. Thereinto, as DPK-I underwent N-N coupling to form BPA, the N-H signal gradually diminished. The C=N structure co-existing in both DPK-I and BPA contributed to a gradual rise in the C=N signal.” Please see them in Page 6 in the revised manuscript.

9. With respect to lines 183-187, the negligible direct electrocatalytic NO<sub>x</sub> reduction to N<sub>2</sub>H<sub>4</sub> only proves the superior feasibility of the BPA-mediated N-N coupling from NH<sub>3</sub>, but certainly it doesn't state any specific requirement for NH<sub>3</sub> generation route.

**Response:** We thank the reviewer again for the comment. In fact, there is no difference in N<sub>2</sub>H<sub>4</sub> generation between NO<sub>x</sub>-derived NH<sub>3</sub> and direct NH<sub>3</sub> feeding. Our demonstration based on NO<sub>x</sub> was to show the pathway to converting renewable NO<sub>x</sub> resources into value-added N<sub>2</sub>H<sub>4</sub>. To avoid misunderstanding, we have discussed this point by “This reiterated the necessity of BPA-mediated N-N coupling processes based on NH<sub>3</sub> as a direct nitrogen source during N<sub>2</sub>H<sub>4</sub> generation.” in the revised manuscript. Please see it in Page 7 of the revised manuscript.

10. In relation to the Raman analysis: although the intercalation of protons is plausible mechanism, Raman spectra of proton intercalated WO<sub>3</sub> (H<sub>x</sub>WO<sub>3</sub>) in literature still show W-O related band. In this case, the progressive decrease of both O-W-O and W-O signals, mostly suggest a reduction of the surface. Related to this, the characterization of WO<sub>3</sub> after electrolysis does not show significant variation. At which voltage was the electrolysis of this sample carried out? How does it correlate with the results of in-situ Raman?

**Response:** We thank the reviewer again for the comment. The interactions between protons and  $\text{WO}_3$  catalysts, leading to the formation of active  $\text{H}_x\text{WO}_3$  species, have been extensively documented in various electrocatalytic studies (*Nat. Commun.* **2022**, *13*, 5382; *Nat. Commun.* **2023**, *14*, 4209; *Nano Energy* **2020**, *71*, 104653). These investigations consistently showed that as the applied potential increases, the intensity of the W-O signal gradually diminishes until it becomes undetectable. Thus, the Raman spectroscopy results presented in this manuscript supported the proposed mechanism involving lattice oxygen-mediated dehydrogenation processes to produce BPA products. Thereinto, the potential range used for in situ Raman spectroscopy closely matched that employed in electrochemical performance testing. Additionally,  $\text{H}_x\text{WO}_3$ , identified as an active species existing on the catalyst surface, could not induce bulk phase transitions in the  $\text{WO}_3$  catalyst. Consequently, post-electrolysis tests confirm that the structure of the used  $\text{WO}_3$  remained similar to that of the initial  $\text{WO}_3$ , which was consistent with findings reported in recent literature.

In the revised manuscript, we have discussed them by “ $\text{H}_x\text{WO}_3$ , recognized as an active species present on the catalyst surface, could not drive bulk phase transitions in the  $\text{WO}_3$  catalyst. Therefore, post-electrolysis tests verify that the structure of the used  $\text{WO}_3$  remained comparable to its initial state.” Please see Page 9 in the revised manuscript.

11. Please correct the title of figure S27, as it corresponds to the in-situ Raman measurement with NiO.

**Response:** We thank the reviewer again for the comment. According to the comment, we have corrected the title of Figure S27 in the supplementary information of the revised manuscript. Please see Page 32 in the supplementary information.

12. Please explain better how the availability of  $\text{H}_2\text{O}$  correlates with the low activity of NiO.

**Response:** We thank the reviewer again for the comment. In the electrocatalytic oxidation reaction involving  $\text{H}_2\text{O}$  molecules, NiO catalyst typically reacts with  $\text{H}_2\text{O}$  to

produce NiOOH active site, involving high oxidation state Ni species (*Chem* **2022**, *6*, 2974-2993). However, in CH<sub>3</sub>CN solvents, there is no interaction between H<sub>2</sub>O molecules and NiO sites to produce NiOOH, thereby limiting the activity of Ni-based catalyst.

In the revised manuscript, we have discussed them by “As a result, electrooxidation reaction on NiO was not favorable due to the limited availability of H<sub>2</sub>O in CH<sub>3</sub>CN solvents hindering the generation of active NiOOH site from NiO and H<sub>2</sub>O.” Please see them in Page 9 in the revised manuscript.

### **Reviewer 5**

I co-reviewed this manuscript with one of the reviewers who provided the listed reports. This is part of the *Nature Communications* initiative to facilitate training in peer review and to provide appropriate recognition for Early Career Researchers who co-review manuscripts.

**Response:** We sincerely thank you for your valuable contribution to reviewing our manuscript. We appreciate your efforts and wish you all the best in your future career endeavors.



## REVIEWERS' COMMENTS

Reviewer #1 (Remarks to the Author):

No more comments.

Reviewer #3 (Remarks to the Author):

The authors have addressed all my comments as well as other reviewers. The manuscript should be published in Nat Commun.

Reviewer #4 (Remarks to the Author):

As commented for the previous version, in this work the authors propose an innovative concept for hydrazine synthesis from ammonia and nitrates, based on a multi-step process. The focus is more specific towards the electrochemical oxidation of ammonia, although the study encompasses a wider perspective involving an initial reduction of nitrate into ammonia.

The values achieved and the concept itself are interesting, and the authors provide insights into mechanistic aspects related to the generation of  $N_2H_4$ , mostly to the effect of ketones and solvents.

For the present version, the authors have carefully considered the reviewers' comments, and have carried out either additional measurements or have provided responses to certain unclear points. Moreover, they have modified and revised the manuscript accordingly.

Therefore, I can recommend its publication in the present form.

## Responses to the comments of the reviewers

### Reviewer 1:

No more comments.

**Response:** We thank the reviewer very much for the positive comment.

### Reviewer 3:

The authors have addressed all my comments as well as other reviewers. The manuscript should be published in Nat Commun.

**Response:** We thank the reviewer very much for the positive comment.

### Reviewer 4:

As commented for the previous version, in this work the authors propose an innovative concept for hydrazine synthesis from ammonia and nitrates, based on a multi-step process. The focus is more specific towards the electrochemical oxidation of ammonia, although the study encompasses a wider perspective involving an initial reduction of nitrate into ammonia.

The values achieved and the concept itself are interesting, and the authors provide insights into mechanistic aspects related to the generation of  $N_2H_4$ , mostly to the effect of ketones and solvents.

For the present version, the authors have carefully considered the reviewers' comments, and have carried out either additional measurements or have provided responses to certain unclear points. Moreover, they have modified and revised the manuscript accordingly.

Therefore, I can recommend its publication in the present form.

**Response:** We thank the reviewer very much for the positive comment.
