# Supplementary material for: Upgrading of nitrate to hydrazine through cascading electrocatalytic ammonia production with controllable N-N coupling
Source: PubMed Central journal article supplement — Nat Commun. 2024 Oct 3;15:8567. doi: 10.1038/s41467-024-52825-1 (PMC11450151; doi:10.1038/s41467-024-52825-1), 2024-10-03
Supplement: 41467_2024_52825_MOESM3_ESM.pdf [file 41467_2024_52825_MOESM3_ESM.pdf]

### **Description of Additional Supplementary Files**

**Supplementary Data 1:** The atomic coordinates of the optimized computational models of different ketone molecules and the corresponding imine molecules.

**Supplementary Data 2:** The atomic coordinates of the optimized computational models of various intermediates generated during N-N coupling on the surface of  $\text{WO}_3$  with and without  $\text{CH}_3\text{CN}$ .
